# Supplementary material
Source: PubMed Central journal article supplement (PMC4790370)
Supplement: antibiotics-03-00285-s001.pdf [file antibiotics-03-00285-s001.pdf]

VIM variants protein sequence alignment- BBL numbering

|        |   |   |   |   |   |   |   |   |   |   |    |    |    |    |    |    |    |    |    |    |    |    |    |    |    |    |    |    |    |    |    |    |    |    |    |    |   |   |
|--------|---|---|---|---|---|---|---|---|---|---|----|----|----|----|----|----|----|----|----|----|----|----|----|----|----|----|----|----|----|----|----|----|----|----|----|----|---|---|
|        | 0 | 1 | 2 | 3 | 4 | 5 | 6 | 7 | 8 | 9 | 10 | 11 | 12 | 13 | 14 | 15 | 16 | 17 | 18 | 19 | 20 | 21 | 22 | 23 | 24 | 25 | 26 | 27 | 28 | 29 | 30 | 31 | 32 | 33 | 34 | 35 |   |   |
| VIM-1  | M | L | K | V | I | S | S | L | L | V | Y  | M  | T  | A  | S  | V  | M  | A  | V  | A  | S  | P  | L  | A  | H  | S  | G  | V  | E  | P  | S  | S  | G  | E  | Y  | P  | T | V |
| VIM-2  | M | F | K | L | L | S | K | L | L | V | Y  | L  | T  | A  | S  | I  | M  | A  | I  | A  | S  | P  | L  | A  | F  | S  | G  | V  | D  | D  | S  | S  | G  | E  | Y  | P  | T | V |
| VIM-3  | M | F | K | L | L | S | K | L | L | V | Y  | L  | T  | A  | S  | I  | M  | A  | I  | A  | S  | P  | L  | A  | F  | S  | V  | V  | D  | S  | S  | G  | E  | Y  | P  | T  | V |   |
| VIM-4  | M | L | K | V | I | S | S | L | L | V | Y  | M  | T  | A  | S  | V  | M  | A  | V  | A  | S  | P  | L  | A  | H  | S  | G  | G  | E  | P  | S  | S  | G  | E  | Y  | P  | T | V |
| VIM-5  | M | L | K | V | I | S | S | L | L | V | Y  | M  | T  | A  | S  | V  | M  | A  | V  | A  | S  | P  | L  | A  | H  | S  | G  | G  | E  | P  | S  | S  | G  | E  | Y  | P  | T | V |
| VIM-6  | M | F | K | L | L | S | K | L | L | V | Y  | L  | T  | A  | S  | I  | M  | A  | I  | A  | S  | P  | L  | A  | F  | S  | V  | A  | D  | Q  | S  | S  | G  | E  | Y  | P  | T | V |
| VIM-7  | M | F | Q | I | R | S | F | L | V | G | I  | S  | A  | F  | V  | -  | M  | A  | V  | L  | G  | S  | A  | A  | Y  | S  | V  | V  | D  | S  | S  | G  | E  | Y  | P  | T  | V |   |
| VIM-8  | M | F | K | L | L | S | K | L | L | V | Y  | L  | T  | A  | S  | I  | M  | A  | I  | A  | S  | P  | L  | A  | F  | S  | V  | V  | D  | S  | S  | G  | E  | Y  | P  | T  | V |   |
| VIM-9  | M | F | K | L | L | S | K | L | L | V | Y  | L  | T  | A  | S  | I  | M  | A  | I  | A  | S  | P  | L  | A  | F  | S  | V  | V  | D  | S  | S  | G  | E  | Y  | P  | T  | V |   |
| VIM-10 | M | F | K | L | L | S | K | L | L | V | Y  | L  | T  | A  | S  | I  | M  | A  | I  | A  | S  | P  | L  | A  | F  | S  | V  | V  | D  | S  | S  | G  | E  | Y  | P  | T  | V |   |
| VIM-11 | M | F | K | L | L | S | K | L | L | V | Y  | L  | T  | A  | S  | I  | M  | A  | I  | A  | S  | P  | L  | A  | F  | S  | V  | V  | D  | S  | S  | G  | E  | Y  | P  | T  | V |   |
| VIM-12 | M | L | K | V | I | S | S | L | L | V | Y  | M  | T  | A  | S  | V  | M  | A  | V  | A  | S  | P  | L  | A  | H  | S  | G  | V  | E  | P  | S  | S  | G  | E  | Y  | P  | T | V |
| VIM-13 | M | L | K | V | I | S | S | L | L | V | Y  | M  | T  | A  | S  | V  | M  | A  | V  | A  | S  | P  | L  | A  | H  | S  | G  | G  | E  | P  | S  | S  | G  | E  | Y  | P  | T | V |
| VIM-14 | M | L | K | V | I | S | S | L | L | V | Y  | M  | T  | A  | S  | V  | M  | A  | V  | A  | S  | P  | L  | A  | H  | S  | G  | G  | E  | P  | S  | S  | G  | E  | Y  | P  | T | V |
| VIM-15 | M | F | K | L | L | S | K | L | L | V | Y  | L  | T  | A  | S  | I  | M  | A  | I  | A  | S  | P  | L  | A  | F  | S  | V  | V  | D  | S  | S  | G  | E  | Y  | P  | T  | V |   |
| VIM-16 | M | F | K | L | L | S | K | L | L | V | Y  | L  | T  | A  | S  | I  | M  | A  | I  | A  | S  | P  | L  | A  | F  | S  | V  | V  | D  | S  | S  | G  | E  | Y  | P  | T  | V |   |
| VIM-17 | M | F | K | L | L | S | K | L | L | V | Y  | L  | T  | A  | S  | M  | M  | A  | I  | A  | S  | P  | L  | A  | F  | S  | V  | V  | D  | S  | S  | G  | E  | Y  | P  | T  | V |   |
| VIM-18 | M | F | K | L | L | S | K | L | L | V | Y  | L  | T  | A  | S  | I  | M  | A  | I  | A  | S  | P  | L  | A  | F  | S  | V  | V  | D  | S  | S  | G  | E  | Y  | P  | T  | V |   |
| VIM-19 | M | L | K | V | I | S | S | L | L | V | Y  | M  | T  | A  | S  | V  | M  | A  | V  | A  | S  | P  | L  | A  | H  | S  | G  | V  | E  | P  | S  | S  | G  | E  | Y  | P  | T | V |
| VIM-23 | M | F | K | L | L | S | K | L | L | V | Y  | L  | T  | A  | S  | I  | M  | A  | I  | A  | S  | P  | L  | A  | F  | S  | V  | V  | D  | S  | S  | G  | E  | Y  | P  | T  | V |   |
| VIM-24 | M | F | K | L | L | S | K | L | L | V | Y  | L  | T  | A  | S  | I  | M  | A  | I  | A  | S  | P  | L  | A  | F  | S  | V  | V  | D  | S  | S  | G  | E  | Y  | P  | T  | V |   |
| VIM-25 | M | L | K | V | I | S | S | L | L | V | Y  | M  | T  | A  | S  | V  | M  | A  | V  | A  | S  | P  | L  | A  | H  | S  | G  | G  | E  | P  | S  | S  | G  | E  | Y  | P  | T | V |
| VIM-26 | M | L | K | V | I | S | S | L | L | V | Y  | M  | T  | A  | S  | V  | M  | A  | V  | A  | S  | P  | L  | A  | H  | S  | G  | G  | E  | P  | S  | S  | G  | E  | Y  | P  | T | V |
| VIM-27 | M | L | K | V | I | S | S | L | L | V | Y  | M  | T  | A  | S  | V  | M  | A  | V  | A  | S  | P  | L  | A  | H  | S  | G  | G  | E  | P  | S  | S  | G  | E  | Y  | P  | T | V |
| VIM-28 | M | L | K | V | I | S | S | L | L | V | Y  | M  | T  | A  | S  | V  | M  | A  | V  | A  | S  | P  | L  | A  | H  | S  | G  | G  | E  | P  | S  | S  | G  | E  | Y  | P  | T | V |
| VIM-29 | M | L | K | V | I | S | S | L | L | V | Y  | M  | T  | A  | S  | V  | M  | A  | V  | A  | S  | P  | L  | A  | H  | S  | G  | G  | E  | P  | S  | S  | G  | E  | Y  | P  | T | V |
| VIM-30 | M | F | K | L | L | S | K | L | L | V | Y  | L  | T  | A  | S  | I  | M  | A  | I  | A  | S  | P  | L  | A  | F  | S  | V  | V  | D  | S  | S  | G  | E  | Y  | P  | T  | V |   |
| VIM-31 | M | F | K | L | L | S | K | L | L | V | Y  | L  | T  | A  | S  | I  | M  | A  | I  | A  | S  | P  | L  | A  | F  | S  | V  | V  | D  | S  | S  | G  | E  | Y  | P  | T  | V |   |
| VIM-32 | M | L | K | V | I | S | S | L | L | V | Y  | M  | T  | A  | S  | V  | M  | A  | V  | A  | S  | P  | L  | A  | H  | S  | G  | G  | E  | P  | S  | S  | G  | E  | Y  | P  | T | V |
| VIM-33 | M | L | K | V | I | S | S | L | L | V | Y  | M  | T  | A  | S  | V  | M  | A  | V  | A  | S  | P  | L  | A  | H  | S  | G  | G  | E  | P  | S  | S  | G  | E  | Y  | P  | T | V |
| VIM-34 | M | L | K | V | I | S | S | L | L | V | Y  | M  | T  | A  | S  | V  | M  | A  | V  | A  | S  | P  | L  | A  | H  | S  | G  | G  | E  | P  | S  | S  | G  | E  | Y  | P  | T | V |
| VIM-35 | M | L | K | V | I | S | S | L | L | V | Y  | M  | T  | A  | S  | V  | M  | A  | V  | A  | S  | P  | L  | A  | H  | S  | G  | G  | E  | P  | S  | S  | G  | E  | Y  | P  | T | V |
| VIM-36 | M | F | K | L | L | S | K | L | L | V | Y  | L  | T  | A  | S  | I  | M  | A  | I  | A  | S  | P  | L  | A  | F  | S  | V  | V  | D  | S  | S  | G  | E  | Y  | P  | T  | V |   |
| VIM-37 | M | L | K | V | I | S | S | L | L | V | Y  | M  | T  | A  | S  | V  | M  | A  | V  | A  | S  | P  | L  | A  | H  | S  | G  | V  | E  | P  | S  | S  | G  | E  | Y  | P  | T | V |
| VIM-38 | M | L | K | V | I | S | S | L | L | V | Y  | L  | T  | A  | S  | V  | M  | A  | V  | A  | S  | P  | L  | A  | H  | S  | G  | G  | E  | P  | S  | S  | G  | E  | Y  | P  | T | V |

Gray: Signal peptide; Red: Zn(II) ligands; Green: positions related to substrate preferences

VIM variants protein sequence alignment- BBL numbering

|        |    |    |    |    |    |    |    |    |    |    |    |    |    |    |    |    |    |    |    |    |    |    |    |    |    |    |    |    |    |    |    |    |    |    |    |    |
|--------|----|----|----|----|----|----|----|----|----|----|----|----|----|----|----|----|----|----|----|----|----|----|----|----|----|----|----|----|----|----|----|----|----|----|----|----|
|        | 36 | 37 | 38 | 39 | 40 | 41 | 42 | 43 | 44 | 45 | 46 | 47 | 48 | 49 | 50 | 51 | 52 | 53 | 54 | 55 | 56 | 57 | 58 | 59 | 60 | 61 | 62 | 63 | 65 | 66 | 67 | 68 | 69 | 70 | 71 | 72 |
| VIM-1  | N  | E  | I  | P  | V  | G  | E  | V  | R  | L  | Y  | Q  | I  | A  | D  | G  | V  | W  | S  | H  | I  | A  | T  | Q  | S  | F  | D  | G  | A  | V  | Y  | P  | S  | N  | G  | L  |
| VIM-2  | S  | E  | I  | P  | V  | G  | E  | V  | R  | L  | Y  | Q  | I  | A  | D  | G  | V  | W  | S  | H  | I  | A  | T  | Q  | S  | F  | D  | G  | A  | V  | Y  | P  | S  | N  | G  | L  |
| VIM-3  | S  | E  | I  | P  | V  | G  | E  | V  | R  | L  | Y  | Q  | I  | A  | D  | G  | V  | W  | S  | H  | I  | A  | T  | K  | S  | F  | D  | G  | A  | V  | Y  | P  | S  | N  | G  | L  |
| VIM-4  | N  | E  | I  | P  | V  | G  | E  | V  | R  | L  | Y  | Q  | I  | A  | D  | G  | V  | W  | S  | H  | I  | A  | T  | Q  | S  | F  | D  | G  | A  | V  | Y  | P  | S  | N  | G  | L  |
| VIM-5  | N  | E  | I  | P  | V  | G  | E  | V  | R  | L  | Y  | Q  | I  | A  | D  | G  | V  | W  | S  | H  | I  | A  | T  | Q  | S  | F  | D  | G  | A  | V  | Y  | P  | S  | N  | G  | L  |
| VIM-6  | S  | E  | I  | P  | V  | G  | E  | V  | R  | L  | Y  | Q  | I  | A  | D  | G  | V  | W  | S  | H  | I  | A  | T  | R  | S  | F  | D  | G  | A  | V  | Y  | P  | S  | N  | G  | L  |
| VIM-7  | D  | D  | I  | P  | V  | G  | E  | V  | R  | L  | Y  | K  | I  | G  | D  | G  | V  | W  | S  | H  | I  | A  | T  | Q  | S  | F  | D  | G  | A  | V  | Y  | P  | S  | N  | G  | L  |
| VIM-8  | S  | E  | I  | P  | V  | G  | E  | V  | R  | L  | Y  | Q  | I  | A  | D  | G  | V  | W  | S  | H  | I  | A  | T  | Q  | S  | F  | D  | G  | A  | V  | Y  | P  | S  | N  | G  | L  |
| VIM-9  | S  | E  | I  | P  | V  | G  | E  | V  | R  | L  | Y  | Q  | I  | A  | D  | G  | V  | W  | S  | H  | I  | A  | T  | Q  | S  | F  | D  | G  | A  | V  | Y  | P  | S  | N  | G  | L  |
| VIM-10 | S  | E  | I  | P  | V  | G  | E  | V  | R  | L  | Y  | Q  | I  | A  | D  | G  | V  | W  | S  | H  | I  | A  | T  | Q  | S  | F  | D  | G  | A  | V  | Y  | P  | S  | N  | G  | L  |
| VIM-11 | S  | E  | I  | P  | V  | G  | E  | V  | R  | L  | Y  | Q  | I  | A  | D  | G  | V  | W  | S  | H  | I  | A  | T  | Q  | S  | F  | D  | G  | A  | V  | Y  | P  | S  | N  | G  | L  |
| VIM-12 | N  | E  | I  | P  | V  | G  | E  | V  | R  | L  | Y  | Q  | I  | A  | D  | G  | V  | W  | S  | H  | I  | A  | T  | Q  | S  | F  | D  | G  | A  | V  | Y  | P  | S  | N  | G  | L  |
| VIM-13 | S  | E  | I  | P  | V  | G  | E  | V  | R  | L  | Y  | Q  | I  | D  | D  | G  | V  | W  | S  | H  | I  | A  | T  | H  | T  | F  | D  | G  | V  | Y  | P  | S  | N  | G  | L  |    |
| VIM-14 | N  | E  | I  | P  | V  | G  | E  | V  | R  | L  | Y  | Q  | I  | A  | D  | G  | V  | W  | S  | H  | I  | A  | T  | Q  | S  | F  | D  | G  | A  | V  | Y  | P  | S  | N  | G  | L  |
| VIM-15 | S  | E  | I  | P  | V  | G  | E  | V  | R  | L  | Y  | Q  | I  | A  | D  | G  | V  | W  | S  | H  | I  | A  | T  | Q  | S  | F  | D  | G  | A  | V  | Y  | P  | S  | N  | G  | L  |
| VIM-16 | S  | E  | I  | P  | V  | G  | E  | V  | R  | L  | Y  | Q  | I  | A  | D  | G  | V  | W  | L  | H  | I  | A  | T  | Q  | S  | F  | D  | G  | A  | V  | Y  | P  | S  | N  | G  | L  |
| VIM-17 | S  | E  | I  | P  | V  | G  | E  | V  | R  | L  | Y  | Q  | I  | A  | D  | G  | V  | W  | S  | H  | I  | A  | T  | Q  | S  | F  | D  | G  | A  | V  | Y  | P  | S  | N  | G  | L  |
| VIM-18 | S  | E  | I  | P  | V  | G  | E  | V  | R  | L  | Y  | Q  | I  | A  | D  | G  | V  | W  | S  | H  | I  | A  | T  | Q  | S  | F  | D  | G  | A  | V  | Y  | P  | S  | N  | G  | L  |
| VIM-19 | N  | E  | I  | P  | V  | G  | E  | V  | R  | L  | Y  | Q  | I  | A  | D  | G  | V  | W  | S  | H  | I  | A  | T  | Q  | S  | F  | D  | G  | A  | V  | Y  | P  | S  | N  | G  | L  |
| VIM-23 | S  | E  | I  | P  | V  | G  | E  | V  | R  | L  | Y  | Q  | I  | A  | D  | G  | V  | W  | S  | H  | I  | A  | T  | Q  | S  | F  | D  | G  | A  | V  | Y  | P  | S  | N  | G  | L  |
| VIM-24 | S  | E  | I  | P  | V  | G  | E  | V  | R  | L  | Y  | Q  | I  | A  | D  | G  | V  | W  | S  | H  | I  | A  | T  | Q  | S  | F  | D  | G  | A  | V  | Y  | P  | S  | N  | G  | L  |
| VIM-25 | N  | E  | I  | P  | V  | G  | E  | V  | R  | L  | Y  | Q  | I  | A  | D  | G  | V  | W  | S  | H  | I  | A  | T  | Q  | S  | F  | D  | G  | A  | V  | Y  | P  | S  | N  | G  | L  |
| VIM-26 | N  | E  | I  | P  | V  | G  | E  | V  | R  | L  | Y  | Q  | I  | A  | D  | G  | V  | W  | S  | H  | I  | A  | T  | Q  | S  | F  | D  | G  | A  |    |    |    |    |    |    |    |

VIM variants protein sequence alignment- BBL numbering

|        |    |    |    |    |    |    |    |    |    |    |    |    |    |    |    |    |    |    |    |    |    |    |    |    |    |    |    |     |     |     |     |     |     |     |     |   |   |   |
|--------|----|----|----|----|----|----|----|----|----|----|----|----|----|----|----|----|----|----|----|----|----|----|----|----|----|----|----|-----|-----|-----|-----|-----|-----|-----|-----|---|---|---|
|        | 73 | 74 | 75 | 76 | 77 | 78 | 79 | 80 | 81 | 82 | 83 | 84 | 85 | 86 | 87 | 88 | 89 | 90 | 91 | 92 | 93 | 94 | 95 | 96 | 97 | 98 | 99 | 100 | 101 | 102 | 103 | 104 | 107 | 108 | 109 |   |   |   |
| VIM-1  | I  | V  | R  | D  | G  | D  | E  | L  | L  | L  | I  | D  | T  | A  | W  | G  | A  | K  | N  | T  | A  | A  | L  | L  | A  | E  | E  | I   | E   | K   | Q   | Q   | I   | G   | L   | P | V |   |
| VIM-2  | I  | V  | R  | D  | G  | D  | E  | L  | L  | L  | I  | D  | T  | A  | W  | G  | A  | K  | N  | T  | A  | A  | L  | L  | A  | E  | E  | I   | E   | K   | Q   | Q   | I   | G   | L   | P | V |   |
| VIM-3  | I  | V  | R  | D  | G  | D  | E  | L  | L  | L  | I  | D  | T  | A  | W  | G  | A  | K  | N  | T  | A  | A  | L  | L  | A  | E  | E  | I   | E   | K   | Q   | Q   | I   | G   | L   | P | V |   |
| VIM-4  | I  | V  | R  | D  | G  | D  | E  | L  | L  | L  | I  | D  | T  | A  | W  | G  | A  | K  | N  | T  | A  | A  | L  | L  | A  | E  | E  | I   | E   | K   | Q   | Q   | I   | G   | L   | P | V |   |
| VIM-5  | I  | V  | R  | D  | G  | D  | E  | L  | L  | L  | I  | D  | T  | A  | W  | G  | A  | K  | N  | T  | A  | A  | L  | L  | A  | E  | E  | I   | E   | K   | Q   | Q   | I   | G   | L   | P | V |   |
| VIM-6  | I  | V  | R  | D  | G  | D  | E  | L  | L  | L  | I  | D  | T  | A  | W  | G  | A  | K  | N  | T  | V  | A  | A  | L  | L  | A  | E  | E   | I   | E   | K   | Q   | Q   | I   | G   | L | P | V |
| VIM-7  | I  | V  | R  | D  | A  | D  | E  | L  | L  | L  | I  | D  | T  | A  | W  | G  | A  | K  | N  | T  | A  | A  | L  | L  | A  | E  | E  | I   | E   | K   | Q   | Q   | I   | G   | L   | P | V |   |
| VIM-8  | I  | V  | R  | D  | G  | D  | E  | L  | L  | L  | I  | D  | T  | A  | W  | G  | A  | K  | N  | T  | A  | A  | L  | L  | A  | E  | E  | I   | E   | K   | Q   | Q   | I   | G   | L   | P | V |   |
| VIM-9  | I  | V  | R  | D  | G  | D  | E  | L  | L  | L  | I  | D  | T  | A  | W  | G  | A  | K  | N  | T  | A  | A  | L  | L  | A  | E  | E  | I   | E   | K   | Q   | Q   | I   | G   | L   | P | V |   |
| VIM-10 | I  | V  | R  | D  | G  | D  | E  | L  | L  | L  | I  | D  | T  | A  | W  | G  | A  | K  | N  | T  | A  | A  | L  | L  | A  | E  | E  | I   | E   | K   | Q   | Q   | I   | G   | L   | P | V |   |
| VIM-11 | I  | V  | R  | D  | G  | D  | E  | L  | L  | L  | I  | D  | T  | A  | W  | G  | A  | K  | N  | T  | A  | A  | L  | L  | A  | E  | E  | I   | E   | K   | Q   | Q   | I   | G   | L   | P | V |   |
| VIM-12 | I  | V  | R  | D  | G  | D  | E  | L  | L  | L  | I  | D  | T  | A  | W  | G  | A  | K  | N  | T  | A  | A  | L  | L  | A  | E  | E  | I   | E   | K   | Q   | Q   | I   | G   | L   | P | V |   |
| VIM-13 | I  | V  | R  | D  | G  | D  | E  | L  | L  | L  | I  | D  | T  | A  | W  | G  | T  | K  | N  | T  | V  | A  | A  | L  | L  | A  | E  | E   | I   | E   | K   | Q   | Q   | I   | G   | L | P | V |
| VIM-14 | I  | V  | R  | D  | G  | D  | E  | L  | L  | L  | I  | D  | T  | A  | W  | G  | A  | K  | N  | T  | A  | A  | L  | L  | A  | E  | E  | I   | E   | K   | Q   | Q   | I   | G   | L   | P | V |   |
| VIM-15 | I  | V  | R  | D  | G  | D  | E  | L  | L  | L  | I  | D  | T  | A  | W  | G  | A  | K  | N  | T  | A  | A  | L  | L  | A  | E  | E  | I   | E   | K   | Q   | Q   | I   | G   | L   | P | V |   |
| VIM-16 | I  | V  | R  | D  | G  | D  | E  | L  | L  | L  | I  | D  | T  | A  | W  | G  | A  | K  | N  | T  | A  | A  | L  | L  | A  | E  | E  | I   | E   | K   | Q   | Q   | I   | G   | L   | P | V |   |
| VIM-17 | I  | V  | R  | D  | G  | D  | E  | L  | L  | L  | I  | D  | T  | A  | W  | G  | A  | K  | N  | T  | A  | A  | L  | L  | A  | E  | E  | I   | E   | K   | Q   | Q   | I   | G   | L   | P | V |   |
| VIM-18 | I  | V  | R  | D  | G  | D  | E  | L  | L  | L  | I  | D  | T  | A  | W  | G  | A  | K  | N  | T  | A  | A  | L  | L  | A  | E  | E  | I   | E   | K   | Q   | Q   | I   | G   | L   | P | V |   |
| VIM-19 | I  | V  | R  | D  | G  | D  | E  | L  | L  | L  | I  | D  | T  | A  | W  | G  | A  | K  | N  | T  | A  | A  | L  | L  | A  | E  | E  | I   | E   | K   | Q   | Q   | I   | G   | L   | P | V |   |
| VIM-23 | I  | V  | R  | D  | G  | D  | E  | L  | L  | L  | I  | D  | T  | A  | W  | G  | A  | K  | N  | T  | A  | A  | L  | L  | A  | E  | E  | I   | E   | K   | Q   | Q   | I   | G   | L   | P | V |   |
| VIM-24 | I  | V  | R  | D  | G  | D  | E  | L  | L  | L  | I  | D  | T  | A  | W  | G  | A  | K  | N  | T  | A  | A  | L  | L  | A  | E  | E  | I   | E   | K   | Q   | Q   | I   | G   | L   | P | V |   |
| VIM-25 | I  | V  | R  | D  | G  | D  | E  | L  | L  | L  | I  | D  | T  | A  | W  | G  | A  | K  | N  | T  | A  | A  | L  | L  | A  | E  | E  | I   | E   | K   | Q   | Q   | I   | G   | L   | P | V |   |
| VIM-26 | I  | V  | R  | D  | G  | D  | E  | L  | L  | L  | I  | D  | T  | A  | W  | G  | A  | K  | N  | T  | A  | A  | L  | L  | A  | E  | E  | I   | E   | K   | Q   | Q   | I   | G   | L   | P | V |   |
| VIM-27 | I  | V  | R  | D  | G  | D  | E  | L  | L  | L  | I  | D  | T  | A  | W  | G  | A  | K  | N  | T  | A  | A  | L  | L  | A  | E  | E  | I   | E   | K   | Q   | Q   | I   | G   | L   | P | V |   |
| VIM-28 | I  | V  | R  | D  | G  | D  | E  | L  | L  | L  | I  | D  | T  | A  | W  | G  | A  | K  | N  | T  | A  | A  | L  | L  | A  | E  | E  | I   | E   | K   | Q   | Q   | I   | G   | L   | P | V |   |
| VIM-29 | I  | V  | R  | D  | G  | D  | E  | L  | L  | L  | I  | D  | T  | A  | W  | G  | A  | K  | N  | T  | A  | A  | L  | L  | A  | E  | E  | I   | E   | K   | Q   | Q   | I   | G   | L   | P | V |   |
| VIM-30 | I  | V  | R  | D  | G  | D  | E  | L  | L  | L  | I  | D  | T  | A  | W  | G  | A  | K  | N  | T  | A  | A  | L  | L  | A  | E  | E  | I   | E   | K   | Q   | Q   | I   | G   | L   | P | V |   |
| VIM-31 | I  | V  | R  | D  | G  | D  | E  | L  | L  | L  | I  | D  | T  | A  | W  | G  | A  | K  | N  | T  | A  | A  | L  | L  | A  | E  | E  | I   | E   | K   | Q   | Q   | I   | G   | L   | P | V |   |
| VIM-32 | I  | V  | R  | D  | G  | D  | E  | L  | L  | L  | I  | D  | T  | A  | W  | G  | A  | K  | N  | T  | A  | A  | L  | L  | A  | E  | E  | I   | E   | K   | Q   | Q   | I   | G   | L   | P | V |   |
| VIM-33 | I  | V  | R  | D  | G  | D  | E  | L  | L  | L  | I  | D  | T  | A  | W  | G  | A  | K  | N  | T  | A  | A  | L  | L  | A  | E  | E  | I   | E   | K   | Q   | Q   | I   | G   | L   | P | V |   |
| VIM-34 | I  | V  | R  | D  | G  | D  | E  | L  | L  | L  | I  | D  | T  | A  | W  | G  | A  | K  | N  | T  | A  | A  | L  | L  | A  | E  | E  | I   | E   | K   | Q   | Q   | I   | G   | L   | P | V |   |
| VIM-35 | I  | V  | R  | D  | G  | D  | E  | L  | L  | L  | I  | D  | T  | A  | W  | G  | A  | K  | N  | T  | A  | A  | L  | L  | A  | E  | E  | I   | E   | K   | Q   | Q   | I   | G   | L   | P | V |   |
| VIM-36 | I  | V  | R  | D  | G  | D  | E  | L  | L  | L  | I  | D  | T  | A  | W  | G  | A  | K  | N  | T  | A  | A  | L  | L  | A  | E  | E  | I   | E   | K   | Q   | Q   | I   | G   | L   | P | V |   |
| VIM-37 | I  | V  | R  | D  | G  | D  | E  | L  | L  | L  | I  | D  | T  | A  | W  | G  | A  | K  | N  | T  | A  | A  | L  | L  | A  | E  | E  | I   | E   | K   | Q   | Q   | I   | G   | L   | P | V |   |
| VIM-38 | I  | V  | R  | D  | G  | D  | E  | L  | L  | L  | I  | D  | T  | A  | W  | G  | A  | K  | N  | T  | A  | A  | L  | L  | A  | E  | E  | I   | E   | K   | Q   | Q   | I   | G   | L   | P | V |   |

Gray: Signal peptide; Red: Zn(II) ligands; Green: positions related to substrate preferences

VIM variants protein sequence alignment- BBL numbering

|        |     |     |     |     |     |     |     |     |     |     |     |     |     |     |     |     |     |     |     |     |     |     |     |     |     |     |     |     |     |     |     |     |     |     |     |     |   |
|--------|-----|-----|-----|-----|-----|-----|-----|-----|-----|-----|-----|-----|-----|-----|-----|-----|-----|-----|-----|-----|-----|-----|-----|-----|-----|-----|-----|-----|-----|-----|-----|-----|-----|-----|-----|-----|---|
|        | 110 | 111 | 112 | 113 | 114 | 115 | 116 | 117 | 118 | 119 | 120 | 121 | 122 | 123 | 124 | 125 | 126 | 127 | 128 | 129 | 130 | 131 | 133 | 134 | 135 | 136 | 137 | 138 | 139 | 140 | 141 | 142 | 143 | 144 | 145 | 146 |   |
| VIM-1  | T   | R   | A   | V   | S   | T   | H   | F   | H   | D   | D   | R   | V   | G   | G   | V   | D   | V   | L   | R   | A   | A   | A   | G   | V   | A   | T   | Y   | A   | S   | P   | S   | T   | R   | R   | L   | A |
| VIM-2  | T   | R   | A   | V   | S   | T   | H   | F   | H   | D   | D   | R   | V   | G   | G   | V   | D   | V   | L   | R   | A   | A   | A   | G   | V   | A   | T   | Y   | A   | S   | P   | S   | T   | R   | R   | L   | A |
| VIM-3  | T   | R   | A   | V   | S   | T   | H   | F   | H   | D   | D   | R   | V   | G   | G   | V   | D   | V   | L   | R   | A   | A   | A   | G   | V   | A   | T   | Y   | A   | S   | P   | S   | T   | R   | R   | L   | A |
| VIM-4  | T   | R   | A   | V   | S   | T   | H   | F   | H   | D   | D   | R   | V   | G   | G   | V   | D   | V   | L   | R   | A   | A   | A   | G   | V   | A   | T   | Y   | A   | S   | P   | S   | T   | R   | R   | L   | A |
| VIM-5  | T   | R   | A   | V   | S   | T   | H   | F   | H   | D   | D   | R   | V   | G   | G   | V   | D   | V   | L   | R   | K   | A   | A   | G   | V   | A   | T   | Y   | A   | S   | P   | S   | T   | R   | R   | L   | A |
| VIM-6  | T   | R   | A   | V   | S   | T   | H   | F   | H   | D   | D   | R   | V   | G   | G   | V   | D   | V   | L   | R   | A   | A   | A   | G   | V   | A   | T   | Y   | A   | S   | P   | S   | T   | R   | R   | L   | A |
| VIM-7  | T   | R   | S   | I   | S   | T   | H   | F   | H   | D   | D   | R   | V   | G   | G   | V   | D   | V   | L   | R   | A   | A   | A   | G   | V   | A   | T   | Y   | T   | S   | P   | L   | T   | R   | Q   | L   | A |
| VIM-8  | T   | R   | A   | V   | S   | T   | H   | F   | H   | D   | D   | R   | V   | G   | G   | V   | D   | V   | L   | R   | A   | A   | A   | G   | V   | A   | T   | Y   | A   | S   | P   | S   | A   | R   | R   | L   | A |
| VIM-9  | T   | R   | A   | V   | S   | T   | H   | F   | H   | D   | D   | R   | V   | G   | G   | V   | D   | V   | L   | R   | A   | A   | A   | G   | V   | A   | T   | Y   | A   | S   | P   | S   | I   | R   | R   | L   | A |
| VIM-10 | T   | R   | A   | V   | S   | T   | H   | F   | H   | D   | D   | R   | V   | G   | G   | V   | D   | V   | L   | R   | A   | A   | A   | G   | V   | A   | T   | Y   | A   | S   | P   | S   | T   | R   | R   | L   | A |
| VIM-11 | T   | R   | A   | V   | S   | T   | H   | F   | H   | D   | D   | R   | V   | G   | G   | V   | D   | V   | L   | R   | A   | A   | A   | G   | V   | A   | T   | Y   | A   | S   | P   | S   | T   | R   | R   | L   | A |
| VIM-12 | T   | R   | A   | V   | S   | T   | H   | F   | H   | D   | D   | R   | V   | G   | G   | V   | D   | V   | L   | R   | A   | A   | A   | G   | V   | A   | T   | Y   | A   | S   | P   | S   | T   | R   | R   | L   | A |
| VIM-13 | T   | R   | S   | V   | S   | T   | H   | F   | H   | D   | D   | R   | V   | G   | G   | V   | D   | A   | L   | R   | A   | A   | A   | G   | V   | A   | T   | Y   | A   | S   | P   | S   | T   | R   | R   | L   | A |
| VIM-14 | T   | R   | A   | V   | S   | T   | H   | F   | H   | D   | D   | R   | V   | G   | G   | V   | D   | V   | L   | R   | A   | A   | A   | G   | V   | A   | T   | Y   | A   | S   | P   | S   | T   | R   | R   | L   | A |
| VIM-15 | T   | R   | A   | V   | S   | T   | H   | F   | H   | D   | D   | R   | V   | G   | G   | V   | D   | V   | L   | R   | A   | A   | A   | G   | V   | A   | T   | Y   | A   | S   | P   | S   | T   | R   | R   | L   | A |
| VIM-16 | T   | R   | A   | V   | S   | T   | H   | F   | H   | D   | D   | R   | V   | G   | G   | V   | D   | V   | L   | R   | A   | A   | A   | G   | V   | A   | T   | Y   | A   | S   | P   | S   | T   | R   | R   | L   | A |
| VIM-17 | T   | R   | A   | V   | S   | T   | H   | F   | H   | D   | D   | R   | V   | G   | G   | V   | D   | V   | L   | R   | A   | A   | A   | G   | V   | A   | T   | Y   | A   | S   | P   | S   | T   | R   | R   | L   | A |
| VIM-18 | T   | R   | A   | V   | S   | T   | H   | F   | H   | D   | D   | R   | V   | G   | G   | V   | D   | V   | L   | R   | A   | A   | A   | G   | V   | A   | T   | Y   | A   | S   | P   | S   | T   | R   | R   | L   | A |
| VIM-19 | T   | R   | A   | V   | S   | T   | H   | F   | H   | D   | D   | R   | V   | G   | G   | V   | D   | V   | L   | R   | A   | A   | A   | G   | V   | A   | T   | Y   | A   | S   | P   | S   | T   | R   | R   | L   | A |
| VIM-23 | T   | R   | A   | V   | S   | T   | H   | F   | H   | D   | D   | R   | V   | G   | G   | V   | D   | V   | L   | R   | A   | A   | A   | G   | V   | A   | T   | Y   | A   | S   | P   | S   | T   | R   | R   | L   | A |
| VIM-24 | T   | R   | A   | V   | S   | T   | H   | F   | H   | D   | D   | R   | V   | G   | G   | V   | D   | V   | L   | R   | A   | A   | A   | G   | V   | A   | T   | Y   | A   | S   | P   | S   | T   | R   | R   | L   | A |
| VIM-25 | T   | R   | A   | V   | S   | T   | H   | F   | H   | D   | D   | R   | V   | G   | G   | V   | D   | V   |     |     |     |     |     |     |     |     |     |     |     |     |     |     |     |     |     |     |   |

VIM variants protein sequence alignment- BBL numbering

|        | 147 | 148 | 149 | 150 | a | 162 | 163 | 164 | 165 | 166 | 167 | 168 | 169 | 170 | 171 | 172 | 173 | 174 | 175 | 176 | 177 | 178 | 179 | 180 | 181 | 182 | 183 | 184 | 185 | 190 | 191 | 192 | 193 | 194 | 195 | 196 |   |   |
|--------|-----|-----|-----|-----|---|-----|-----|-----|-----|-----|-----|-----|-----|-----|-----|-----|-----|-----|-----|-----|-----|-----|-----|-----|-----|-----|-----|-----|-----|-----|-----|-----|-----|-----|-----|-----|---|---|
| VIM-1  | E   | A   | E   | G   | N | E   | I   | P   | T   | H   | S   | L   | E   | G   | L   | S   | S   | S   | G   | D   | A   | V   | R   | R   | F   | G   | P   | V   | E   | L   | F   | Y   | P   | G   | A   | A   | H |   |
| VIM-2  | E   | V   | E   | G   | N | E   | I   | P   | T   | H   | S   | L   | E   | G   | L   | S   | S   | S   | G   | D   | A   | V   | R   | R   | F   | G   | P   | V   | E   | L   | F   | Y   | P   | G   | A   | A   | H |   |
| VIM-3  | E   | V   | E   | G   | N | E   | I   | P   | T   | H   | S   | L   | E   | G   | L   | S   | S   | S   | G   | D   | A   | V   | R   | R   | F   | G   | P   | V   | E   | L   | F   | Y   | P   | G   | A   | A   | H |   |
| VIM-4  | E   | A   | E   | G   | N | E   | I   | P   | T   | H   | S   | L   | E   | G   | L   | S   | S   | S   | G   | D   | A   | V   | R   | R   | F   | G   | P   | V   | E   | L   | F   | Y   | P   | G   | A   | A   | H |   |
| VIM-5  | E   | A   | E   | G   | N | E   | I   | P   | T   | H   | S   | L   | E   | G   | L   | S   | S   | S   | G   | D   | A   | V   | R   | R   | F   | G   | P   | V   | E   | L   | F   | Y   | P   | G   | A   | A   | H |   |
| VIM-6  | E   | V   | E   | G   | N | E   | I   | P   | T   | H   | S   | L   | E   | G   | L   | S   | S   | S   | G   | D   | A   | V   | R   | R   | F   | G   | P   | V   | E   | L   | F   | Y   | P   | G   | A   | A   | H |   |
| VIM-7  | E   | A   | A   | G   | N | E   | V   | P   | A   | H   | S   | L   | E   | K   | A   | L   | S   | S   | S   | G   | D   | V   | V   | R   | R   | F   | G   | P   | V   | E   | L   | F   | Y   | P   | G   | A   | A | H |
| VIM-8  | E   | V   | E   | G   | N | E   | I   | P   | T   | H   | S   | L   | E   | G   | L   | S   | S   | S   | G   | D   | A   | V   | R   | R   | F   | G   | P   | V   | E   | L   | F   | Y   | P   | G   | A   | A   | H |   |
| VIM-9  | E   | V   | E   | G   | N | E   | I   | P   | T   | H   | S   | L   | E   | G   | L   | S   | S   | S   | G   | D   | A   | V   | R   | R   | F   | G   | P   | V   | E   | L   | F   | Y   | P   | G   | A   | A   | H |   |
| VIM-10 | E   | V   | E   | G   | N | E   | I   | P   | T   | H   | S   | L   | E   | G   | L   | S   | S   | S   | G   | D   | A   | V   | R   | R   | F   | G   | P   | V   | E   | L   | F   | Y   | P   | G   | A   | A   | H |   |
| VIM-11 | E   | V   | E   | G   | N | E   | I   | P   | T   | H   | S   | L   | E   | G   | L   | S   | S   | S   | G   | D   | A   | V   | R   | R   | F   | G   | P   | V   | E   | L   | F   | Y   | P   | G   | A   | A   | H |   |
| VIM-12 | E   | A   | E   | G   | N | E   | I   | P   | T   | H   | S   | L   | E   | G   | L   | S   | S   | S   | G   | D   | A   | V   | R   | R   | F   | G   | P   | V   | E   | L   | F   | Y   | P   | G   | A   | A   | H |   |
| VIM-13 | E   | A   | E   | G   | N | E   | V   | P   | T   | H   | S   | L   | E   | G   | L   | S   | S   | S   | G   | D   | A   | V   | R   | R   | F   | G   | P   | V   | E   | L   | F   | Y   | P   | G   | A   | A   | H |   |
| VIM-14 | E   | A   | E   | G   | N | E   | I   | P   | T   | H   | S   | L   | E   | G   | L   | S   | S   | S   | G   | D   | A   | V   | R   | R   | F   | G   | P   | V   | E   | L   | F   | Y   | P   | G   | A   | A   | H |   |
| VIM-15 | E   | V   | E   | G   | N | E   | I   | P   | T   | H   | S   | L   | E   | G   | L   | S   | S   | S   | G   | D   | A   | V   | R   | R   | F   | G   | P   | V   | E   | L   | F   | Y   | P   | G   | A   | A   | H |   |
| VIM-16 | E   | V   | E   | G   | N | E   | I   | P   | T   | H   | S   | L   | E   | G   | L   | S   | S   | S   | G   | D   | A   | V   | R   | R   | F   | G   | P   | V   | E   | L   | F   | Y   | P   | G   | A   | A   | H |   |
| VIM-17 | E   | V   | E   | G   | N | E   | I   | P   | T   | H   | S   | L   | E   | G   | L   | S   | S   | S   | G   | D   | A   | V   | R   | R   | F   | G   | P   | V   | E   | L   | F   | Y   | P   | G   | A   | A   | H |   |
| VIM-18 | -   | -   | -   | -   | - | -   | -   | -   | -   | -   | -   | -   | -   | -   | -   | -   | -   | -   | -   | -   | -   | -   | -   | -   | -   | -   | -   | -   | -   | -   | -   | -   | -   | -   | -   | -   | - | - |
| VIM-19 | E   | A   | E   | G   | N | E   | I   | P   | T   | H   | S   | L   | E   | G   | L   | S   | S   | S   | G   | D   | A   | V   | R   | R   | F   | G   | P   | V   | E   | L   | F   | Y   | P   | G   | A   | A   | H |   |
| VIM-23 | E   | V   | E   | G   | N | E   | I   | P   | T   | H   | S   | L   | E   | G   | L   | S   | S   | S   | G   | D   | A   | V   | R   | R   | F   | G   | P   | V   | E   | L   | F   | Y   | P   | G   | A   | A   | H |   |
| VIM-24 | E   | V   | E   | G   | N | E   | I   | P   | T   | H   | S   | L   | E   | G   | L   | S   | S   | S   | G   | D   | A   | V   | R   | R   | F   | G   | P   | V   | E   | L   | F   | Y   | P   | G   | A   | A   | H |   |
| VIM-25 | E   | A   | E   | G   | N | E   | I   | P   | T   | H   | S   | L   | E   | G   | L   | S   | S   | S   | G   | D   | A   | V   | R   | R   | F   | G   | P   | V   | E   | L   | F   | Y   | P   | G   | A   | A   | H |   |
| VIM-26 | E   | A   | E   | G   | N | E   | I   | P   | T   | H   | S   | L   | E   | G   | L   | S   | S   | S   | G   | D   | A   | V   | R   | R   | F   | G   | P   | V   | E   | L   | F   | Y   | P   | G   | A   | A   | H |   |
| VIM-27 | E   | A   | E   | G   | N | E   | I   | P   | T   | H   | S   | L   | E   | G   | L   | S   | S   | S   | G   | D   | A   | V   | R   | R   | F   | G   | P   | V   | E   | L   | F   | Y   | P   | G   | A   | A   | H |   |
| VIM-28 | E   | A   | E   | G   | N | E   | I   | P   | T   | H   | S   | L   | E   | G   | L   | S   | S   | S   | G   | D   | A   | V   | R   | R   | F   | G   | P   | V   | E   | L   | F   | Y   | P   | G   | A   | A   | H |   |
| VIM-29 | E   | A   | E   | G   | N | E   | I   | P   | T   | H   | S   | L   | E   | G   | L   | S   | S   | S   | G   | D   | A   | V   | R   | R   | F   | G   | P   | V   | E   | L   | F   | Y   | P   | G   | A   | A   | H |   |
| VIM-30 | E   | V   | E   | G   | N | E   | I   | P   | T   | H   | S   | L   | E   | G   | L   | S   | S   | S   | G   | D   | A   | V   | R   | R   | F   | G   | P   | V   | E   | L   | F   | Y   | P   | G   | A   | A   | H |   |
| VIM-31 | E   | V   | E   | G   | N | E   | I   | P   | T   | H   | S   | L   | E   | G   | L   | S   | S   | S   | G   | D   | A   | V   | R   | R   | F   | G   | P   | V   | E   | L   | F   | Y   | P   | G   | A   | A   | H |   |
| VIM-32 | E   | A   | A   | G   | N | E   | I   | P   | T   | H   | S   | L   | E   | G   | L   | S   | S   | S   | G   | D   | A   | V   | R   | R   | F   | G   | P   | V   | E   | L   | F   | Y   | P   | G   | A   | A   | H |   |
| VIM-33 | E   | A   | E   | G   | N | E   | I   | P   | T   | H   | S   | L   | E   | G   | L   | S   | S   | S   | G   | D   | A   | V   | R   | R   | F   | G   | P   | V   | E   | L   | F   | Y   | P   | G   | A   | A   | H |   |
| VIM-34 | E   | A   | E   | G   | N | E   | I   | P   | T   | H   | S   | L   | E   | G   | L   | S   | S   | S   | G   | D   | A   | V   | R   | R   | F   | G   | P   | V   | E   | L   | F   | Y   | P   | G   | A   | A   | H |   |
| VIM-35 | E   | A   | E   | G   | N | E   | I   | P   | T   | H   | S   | L   | E   | G   | L   | S   | S   | S   | G   | D   | A   | V   | R   | R   | F   | G   | P   | V   | E   | L   | F   | Y   | P   | G   | A   | A   | H |   |
| VIM-36 | E   | V   | E   | G   | N | E   | I   | P   | T   | H   | S   | L   | E   | G   | L   | S   | S   | S   | G   | D   | A   | V   | R   | R   | F   | G   | P   | V   | E   | L   | F   | Y   | P   | G   | A   | A   | H |   |
| VIM-37 | E   | A   | E   | G   | N | E   | I   | P   | T   | H   | S   | L   | E   | G   | L   | S   | S   | S   | G   | D   | A   | V   | R   | R   | F   | G   | P   | V   | E   | L   | F   | Y   | P   | G   | A   | A   | H |   |
| VIM-38 | E   | A   | E   | G   | N | E   | I   | P   | T   | H   | S   | L   | E   | G   | L   | S   | S   | S   | G   | D   | A   | V   | R   | R   | F   | G   | P   | V   | E   | L   | F   | Y   | P   | G   | A   | A   | H |   |

Gray: Signal peptide; Red: Zn(II) ligands; Green: positions related to substrate preferences

VIM variants protein sequence alignment- BBL numbering

|        | 197 | 198 | 199 | 200 | 201 | 202 | 203 | 204 | 205 | 206 | 207 | 208 | 215 | 216 | 217 | 218 | 219 | 220 | 221 | 222 | 223 | 224 | 225 | 226 | 227 | 228 | 229 | 230 | 231 | 232 | 233 | 234 | 235 | 236 | 237 | 238 |
|--------|-----|-----|-----|-----|-----|-----|-----|-----|-----|-----|-----|-----|-----|-----|-----|-----|-----|-----|-----|-----|-----|-----|-----|-----|-----|-----|-----|-----|-----|-----|-----|-----|-----|-----|-----|-----|
| VIM-1  | S   | T   | D   | N   | L   | V   | V   | Y   | V   | P   | S   | A   | N   | V   | L   | Y   | G   | G   | C   | A   | V   | H   | E   | L   | S   | S   | T   | S   | A   | G   | N   | V   | A   | D   | A   | D   |
| VIM-2  | S   | T   | D   | N   | L   | V   | V   | Y   | V   | P   | S   | A   | S   | V   | L   | Y   | G   | G   | C   | A   | I   | Y   | E   | L   | S   | R   | T   | S   | A   | G   | N   | V   | A   | D   | A   | D   |
| VIM-3  | S   | T   | D   | N   | L   | V   | V   | Y   | V   | P   | S   | A   | S   | V   | L   | Y   | G   | G   | C   | A   | I   | Y   | E   | L   | S   | R   | T   | S   | A   | G   | N   | V   | A   | D   | A   | D   |
| VIM-4  | S   | T   | D   | N   | L   | V   | V   | Y   | V   | P   | S   | A   | N   | V   | L   | Y   | G   | G   | C   | A   | V   | H   | E   | L   | S   | R   | T   | S   | A   | G   | N   | V   | A   | D   | A   | D   |
| VIM-5  | S   | T   | D   | N   | L   | V   | V   | Y   | V   | P   | S   | A   | N   | V   | L   | Y   | G   | G   | C   | A   | V   | L   | A   | L   | S   | R   | T   | S   | A   | G   | N   | V   | A   | D   | A   | D   |
| VIM-6  | S   | T   | D   | N   | L   | V   | V   | Y   | V   | P   | S   | A   | S   | V   | L   | Y   | G   | G   | C   | A   | I   | Y   | E   | L   | S   | R   | T   | S   | A   | G   | N   | V   | A   | D   | A   | D   |
| VIM-7  | S   | G   | D   | N   | L   | V   | V   | Y   | V   | P   | A   | V   | R   | V   | L   | F   | G   | G   | C   | A   | V   | H   | E   | A   | S   | R   | E   | S   | A   | G   | N   | V   | A   | D   | A   | N   |
| VIM-8  | S   | T   | D   | N   | L   | V   | V   | Y   | V   | P   | S   | A   | S   | V   | L   | Y   | G   | G   | C   | A   | I   | Y   | E   | L   | S   | R   | T   | S   | A   | G   | N   | V   | A   | D   | A   | D   |
| VIM-9  | S   | T   | D   | N   | L   | V   | V   | Y   | V   | P   | S   | A   | S   | V   | L   | Y   | G   | G   | C   | A   | I   | Y   | E   | L   | S   | R   | T   | S   | A   | G   | N   | V   | A   | D   | A   | D   |
| VIM-10 | S   | T   | D   | N   | L   | V   | V   | Y   | V   | P   | S   | A   | S   | V   | L   | Y   | G   | G   | C   | A   | I   | Y   | E   | L   | S   | R   | T   | S   | A   | G   | N   | V   | A   | D   | A   | D   |
| VIM-11 | S   | T   | D   | N   | L   | V   | V   | Y   | V   | P   | S   | A   | S   | V   | L   | Y   | G   | G   | C   | A   | I   | Y   | E   | L   | S   | R   | T   | S   | A   | G   | N   | V   | A   | D   | A   | D   |
| VIM-12 | S   | T   | D   | N   | L   | V   | V   | Y   | V   | P   | S   | A   | N   | V   | L   | Y   | G   | G   | C   | A   | V   | H   | E   | L   | S   | S   | T   | S   | A   | G   | N   | V   | A   | D   | A   | D   |
| VIM-13 | S   | T   | D   | N   | L   | V   | V   | Y   | V   | P   | S   | A   | N   | V   | L   | Y   | G   | G   | C   | A   | V   | L   | E   | L   | S   | R   | T   | S   | A   | G   | N   | V   | A   | D   | A   | D   |
| VIM-14 | S   | T   | D   | N   | L   | V   | V   | Y   | V   | P   | S   | A   | N   | V   | L   | Y   | G   | G   | C   | A   | V   | H   | E   | L   | S   | R   | T   | S   | A   | G   | N   | V   | A   | D   | A   | D   |
| VIM-15 | S   | T   | D   | N   | L   | V   | V   | Y   | V   | P   | S   | A   | S   | V   | L   | F   | G   | G   | C   | A   | I   | Y   | E   | L   | S   | R   | T   | S   | A   | G   | N   | V   | A   | D   | A   | D   |
| VIM-16 | S   | T   | D   | N   | L   | V   | V   | Y   | V   | P   | S   | A   | S   | V   | L   | Y   | G   | G   | C   | A   | I   | Y   | E   | L   | S   | R   | T   | S   | A   | G   | N   | V   | A   | D   | A   | D   |
| VIM-17 | S   | T   | D   | N   | L   | V   | V   | Y   | V   | P   | S   | A   | S   | V   | L   | Y   | G   | G   | C   | A   | I   | Y   | E   | L   | S   | R   | T   | S   | A   | G   | N   | V   | A   | D   | A   | D   |
| VIM-18 | S   | T   | D   | N   | L   | V   | V   | Y   | V   | P   | S   | A   | S   | V   | L   | Y   | G   | G   | C   | A   | I   | Y   | E   | L   | S   | R   | T   | S   | A   | G   | N   | V   | A   | D   | A   | D   |
| VIM-19 | S   | T   | D   | N   | L   | V   | V   | Y   | V   | P   | S   | A   | K   | V   | L   | Y   | G   | G   | C   | A   | V   | H   | E   | L   | S   | R   | T   | S   | A   | G   | N   | V   | A   | D   | A   | D   |
| VIM-23 | S   | T   | D   | N   | L   | V   | V   | Y   | V   | P   | S   | A   | S   | V   | L   | Y   | G   | G   | C   | A   | I   | Y   | E   | L   | S   | S   | T   | S   | A   | G   | N   | V   | A   | D   | A   | D   |
| VIM-24 | S   | T   | D   | N   | L   | V   | V   | Y   | V   | P   | S   | A   | S   | V   | L   | Y   | G   | G   | C   | A   | I   | Y   | E   | L   | S   | L   | T   | S   | A   | G   | N   | V   | A   | D   | A   | D   |
| VIM-25 | S   | T   | D   | N   | L   | V   | V   | Y   | V   | P   | S   | A   | N   | V   | L   | Y   | G   | G   | C   | A   | V   | L   | A   | L   | S   | R   | T   | S   | A   | G   | N   | V   | A   | D   | A   | D   |
| VIM-26 | S   | T   | D   | N   | L   | V   | V   | Y   | V   | P   | S   | A   | N   | V   | L   | Y   | G   | G   | C   | A   | V   | L   | E   | L   | S   | S   | T   | S   |     |     |     |     |     |     |     |     |

VIM variants protein sequence alignment- BBL numbering

|        | 241 | 242 | 243 | 244 | 245 | 246 | 247 | 248 | 249 | 250 | 251 | 252 | 253 | 254 | a | b | 255 | 256 | 257 | 258 | 259 | 260 | 261 | 262 | 263 | 264 | 265 | 266 | 295 | 296 | 297 | 298 | 299 | 300 | 301 | 302 |   |
|--------|-----|-----|-----|-----|-----|-----|-----|-----|-----|-----|-----|-----|-----|-----|---|---|-----|-----|-----|-----|-----|-----|-----|-----|-----|-----|-----|-----|-----|-----|-----|-----|-----|-----|-----|-----|---|
| VIM-1  | L   | A   | E   | W   | P   | T   | S   | V   | E   | R   | I   | Q   | K   | H   | Y | P | E   | A   | E   | V   | V   | I   | P   | G   | H   | G   | L   | P   | G   | G   | L   | D   | L   | L   | L   | Q   | H |
| VIM-2  | L   | A   | E   | W   | P   | T   | S   | I   | E   | R   | I   | Q   | K   | H   | Y | P | E   | A   | Q   | F   | V   | I   | P   | G   | H   | G   | L   | P   | G   | G   | L   | D   | L   | L   | L   | K   | H |
| VIM-3  | L   | A   | E   | W   | P   | T   | S   | I   | E   | R   | I   | Q   | K   | H   | Y | P | E   | A   | Q   | F   | V   | I   | P   | G   | H   | G   | L   | P   | G   | G   | L   | D   | L   | L   | L   | K   | H |
| VIM-4  | L   | A   | E   | W   | P   | T   | S   | V   | E   | R   | I   | Q   | K   | H   | Y | P | E   | A   | E   | V   | V   | I   | P   | G   | H   | G   | L   | P   | G   | G   | L   | D   | L   | L   | L   | Q   | H |
| VIM-5  | L   | A   | E   | W   | P   | T   | S   | V   | E   | R   | I   | Q   | K   | H   | Y | P | E   | A   | E   | V   | V   | I   | P   | G   | H   | G   | L   | P   | G   | G   | L   | D   | L   | L   | L   | Q   | H |
| VIM-6  | L   | A   | E   | W   | P   | T   | S   | I   | E   | R   | I   | Q   | K   | H   | Y | P | E   | A   | Q   | F   | V   | I   | P   | G   | H   | G   | L   | P   | G   | G   | L   | D   | L   | L   | L   | K   | H |
| VIM-7  | L   | A   | E   | W   | P   | A   | T   | I   | K   | R   | I   | Q   | Q   | R   | Y | P | E   | A   | E   | V   | V   | I   | P   | G   | H   | G   | L   | P   | G   | G   | L   | D   | L   | L   | L   | Q   | H |
| VIM-8  | L   | A   | E   | W   | P   | T   | S   | I   | E   | R   | I   | Q   | K   | H   | Y | P | E   | A   | Q   | F   | V   | I   | P   | G   | H   | G   | L   | P   | G   | G   | L   | D   | L   | L   | L   | K   | H |
| VIM-9  | L   | A   | E   | W   | P   | T   | S   | I   | E   | R   | I   | Q   | K   | H   | Y | P | E   | A   | Q   | F   | V   | I   | P   | G   | H   | G   | L   | P   | G   | G   | L   | D   | L   | L   | L   | K   | H |
| VIM-10 | L   | A   | E   | W   | P   | T   | S   | I   | E   | R   | I   | Q   | K   | H   | Y | P | E   | A   | Q   | F   | V   | I   | P   | G   | H   | G   | L   | P   | G   | G   | L   | D   | L   | L   | L   | K   | H |
| VIM-11 | L   | A   | E   | W   | P   | T   | S   | I   | E   | R   | I   | Q   | K   | H   | Y | P | E   | A   | Q   | F   | V   | I   | P   | G   | H   | G   | L   | P   | G   | G   | L   | D   | L   | L   | L   | K   | H |
| VIM-12 | L   | A   | E   | W   | P   | T   | S   | I   | E   | R   | I   | Q   | K   | H   | Y | P | E   | A   | Q   | F   | V   | I   | P   | G   | H   | G   | L   | P   | G   | G   | L   | D   | L   | L   | L   | K   | H |
| VIM-13 | L   | A   | E   | W   | P   | G   | S   | V   | E   | R   | I   | Q   | K   | H   | Y | P | E   | A   | E   | V   | V   | I   | P   | G   | H   | G   | L   | P   | G   | G   | L   | D   | L   | L   | L   | Q   | H |
| VIM-14 | L   | A   | E   | W   | P   | T   | S   | V   | E   | R   | I   | Q   | K   | H   | Y | P | E   | A   | E   | V   | V   | I   | P   | G   | H   | G   | L   | P   | G   | G   | L   | D   | L   | L   | L   | Q   | H |
| VIM-15 | L   | A   | E   | W   | P   | T   | S   | V   | E   | R   | I   | Q   | K   | H   | Y | P | E   | A   | Q   | F   | V   | I   | P   | G   | H   | G   | L   | P   | G   | G   | L   | D   | L   | L   | L   | K   | H |
| VIM-16 | L   | A   | E   | W   | P   | T   | S   | I   | E   | R   | I   | Q   | K   | H   | Y | P | E   | A   | Q   | F   | V   | I   | P   | G   | H   | G   | L   | P   | G   | G   | L   | D   | L   | L   | L   | K   | H |
| VIM-17 | L   | A   | E   | W   | P   | T   | S   | I   | E   | R   | I   | Q   | K   | H   | Y | P | E   | A   | Q   | F   | V   | I   | P   | G   | H   | G   | L   | P   | G   | G   | L   | D   | L   | L   | L   | K   | H |
| VIM-18 | L   | A   | E   | W   | P   | T   | S   | V   | E   | R   | I   | Q   | K   | H   | Y | P | E   | A   | Q   | F   | V   | I   | P   | G   | H   | G   | L   | P   | G   | G   | L   | D   | L   | L   | L   | K   | H |
| VIM-19 | L   | A   | E   | W   | P   | T   | S   | V   | E   | R   | I   | Q   | K   | H   | Y | P | E   | A   | E   | V   | V   | I   | P   | G   | H   | G   | L   | P   | G   | G   | L   | D   | L   | L   | L   | Q   | H |
| VIM-23 | L   | A   | E   | W   | P   | T   | S   | I   | E   | R   | I   | Q   | K   | H   | Y | P | E   | A   | Q   | F   | V   | I   | P   | G   | H   | G   | L   | P   | G   | G   | L   | D   | L   | L   | L   | K   | H |
| VIM-24 | L   | A   | E   | W   | P   | T   | S   | I   | E   | R   | I   | Q   | K   | H   | Y | P | E   | A   | Q   | F   | V   | I   | P   | G   | H   | G   | L   | P   | G   | G   | L   | D   | L   | L   | L   | K   | H |
| VIM-25 | L   | A   | E   | W   | P   | T   | S   | V   | E   | R   | I   | Q   | K   | H   | Y | P | E   | A   | E   | V   | V   | I   | P   | G   | H   | G   | L   | P   | G   | G   | L   | D   | L   | L   | L   | K   | H |
| VIM-26 | L   | A   | E   | W   | P   | T   | S   | V   | E   | R   | I   | Q   | K   | H   | Y | P | E   | A   | Q   | F   | V   | I   | P   | G   | H   | G   | L   | P   | G   | G   | L   | D   | L   | L   | L   | Q   | H |
| VIM-27 | L   | A   | E   | W   | P   | T   | S   | V   | E   | R   | I   | Q   | K   | H   | Y | P | E   | A   | E   | V   | V   | I   | P   | G   | H   | G   | L   | P   | G   | G   | L   | D   | L   | L   | L   | Q   | H |
| VIM-28 | L   | A   | E   | W   | P   | T   | S   | V   | E   | R   | I   | Q   | K   | H   | Y | P | E   | A   | E   | V   | V   | I   | P   | G   | H   | G   | L   | P   | G   | G   | L   | D   | L   | L   | L   | Q   | H |
| VIM-29 | L   | A   | E   | W   | P   | T   | S   | V   | E   | R   | I   | Q   | K   | R   | Y | P | E   | A   | E   | V   | V   | I   | P   | G   | H   | G   | L   | P   | G   | G   | L   | D   | L   | L   | L   | Q   | H |
| VIM-30 | L   | A   | E   | W   | P   | T   | S   | I   | E   | R   | I   | Q   | K   | H   | Y | P | E   | A   | Q   | F   | V   | I   | P   | G   | H   | G   | L   | P   | G   | G   | L   | D   | L   | L   | L   | K   | H |
| VIM-31 | L   | A   | E   | W   | P   | T   | S   | I   | E   | R   | I   | Q   | K   | H   | Y | P | E   | A   | Q   | F   | V   | I   | P   | G   | H   | G   | L   | P   | G   | G   | L   | D   | L   | L   | L   | K   | H |
| VIM-32 | L   | A   | E   | W   | P   | T   | S   | V   | E   | R   | I   | Q   | K   | H   | Y | P | E   | A   | E   | V   | V   | I   | P   | G   | H   | G   | L   | P   | G   | G   | L   | D   | L   | L   | L   | Q   | H |
| VIM-33 | L   | A   | E   | W   | P   | T   | S   | V   | E   | R   | I   | Q   | K   | H   | Y | P | E   | A   | E   | V   | V   | I   | P   | G   | H   | G   | L   | P   | G   | G   | L   | D   | L   | L   | L   | Q   | H |
| VIM-34 | L   | A   | E   | W   | P   | T   | S   | V   | E   | R   | I   | Q   | K   | H   | Y | P | E   | A   | E   | V   | V   | I   | P   | G   | H   | G   | L   | P   | G   | G   | L   | D   | L   | L   | L   | Q   | H |
| VIM-35 | L   | A   | E   | W   | P   | T   | S   | V   | E   | R   | I   | Q   | K   | H   | Y | P | E   | A   | E   | V   | V   | I   | P   | G   | H   | G   | L   | P   | G   | G   | L   | D   | L   | L   | L   | Q   | H |
| VIM-36 | L   | A   | E   | W   | P   | T   | S   | V   | E   | R   | I   | Q   | K   | H   | Y | P | E   | A   | Q   | F   | V   | I   | P   | G   | H   | G   | L   | P   | G   | G   | L   | D   | L   | L   | L   | K   | H |
| VIM-37 | L   | A   | E   | W   | P   | T   | S   | V   | E   | R   | I   | Q   | K   | H   | Y | P | E   | A   | E   | V   | V   | I   | P   | G   | H   | G   | L   | P   | G   | G   | L   | D   | L   | L   | L   | Q   | H |
| VIM-38 | L   | A   | E   | W   | P   | T   | S   | V   | E   | R   | I   | Q   | K   | H   | Y | P | E   | A   | E   | V   | V   | I   | P   | G   | H   | G   | L   | P   | G   | G   | L   | D   | L   | L   | L   | Q   | H |

Gray: Signal peptide; Red: Zn(II) ligands; Green: positions related to substrate preferences

VIM variants protein sequence alignment- BBL numbering

|        | 303 | 304 | 305 | 306 | 307 | 308 | 309 | 310 | 311 | 312 | 313 | 314 | 315 | 316 | 317 |
|--------|-----|-----|-----|-----|-----|-----|-----|-----|-----|-----|-----|-----|-----|-----|-----|
| VIM-1  | T   | A   | N   | V   | V   | K   | A   | H   | K   | N   | R   | S   | V   | A   | E   |
| VIM-2  | T   | T   | N   | V   | V   | K   | A   | H   | T   | N   | R   | S   | V   | V   | E   |
| VIM-3  | T   | T   | N   | V   | V   | K   | A   | H   | T   | N   | R   | S   | V   | V   | E   |
| VIM-4  | T   | A   | N   | V   | V   | K   | A   | H   | K   | N   | R   | S   | V   | A   | E   |
| VIM-5  | T   | A   | N   | V   | V   | T   | A   | H   | K   | N   | R   | S   | V   | A   | E   |
| VIM-6  | T   | T   | N   | V   | V   | K   | A   | H   | T   | N   | R   | S   | V   | V   | E   |
| VIM-7  | T   | T   | N   | V   | V   | K   | T   | H   | K   | V   | R   | P   | V   | A   | E   |
| VIM-8  | T   | T   | N   | V   | V   | K   | A   | H   | T   | N   | R   | S   | V   | V   | E   |
| VIM-9  | T   | T   | N   | V   | V   | K   | A   | H   | T   | N   | R   | S   | V   | V   | E   |
| VIM-10 | T   | T   | N   | V   | V   | K   | A   | H   | T   | N   | R   | S   | V   | V   | E   |
| VIM-11 | T   | T   | N   | V   | V   | K   | A   | H   | T   | N   | R   | S   | V   | V   | E   |
| VIM-12 | T   | T   | N   | V   | V   | K   | A   | H   | T   | N   | R   | S   | V   | V   | E   |
| VIM-13 | T   | A   | N   | V   | V   | K   | A   | H   | T   | N   | R   | S   | V   | A   | E   |
| VIM-14 | T   | A   | N   | V   | V   | K   | A   | H   | K   | N   | R   | S   | V   | A   | E   |
| VIM-15 | T   | T   | N   | V   | V   | K   | A   | H   | T   | N   | R   | S   | V   | V   | E   |
| VIM-16 | T   | T   | N   | V   | V   | K   | A   | H   | T   | N   | R   | S   | V   | V   | E   |
| VIM-17 | T   | T   | N   | V   | V   | K   | A   | H   | T   | N   | R   | S   | V   | V   | E   |
| VIM-18 | T   | T   | N   | V   | V   | K   | A   | H   | T   | N   | R   | S   | V   | V   | E   |
| VIM-19 | T   | A   | N   | V   | V   | K   | A   | H   | K   | N   | R   | S   | V   | A   | E   |
| VIM-23 | T   | T   | N   | V   | V   | K   | A   | H   | T   | N   | R   | S   | V   | V   | E   |
| VIM-24 | T   | T   | N   | V   | V   | K   | A   | H   | T   | N   | R   | S   | V   | V   | E   |
| VIM-25 | T   | T   | N   | V   | V   | K   | A   | H   | T   | N   | R   | S   | V   | V   | E   |
| VIM-26 | T   | A   | N   | V   | V   | K   | A   | H   | K   | N   | R   | S   | V   | A   | E   |
| VIM-27 | T   | A   | N   | V   | V   | K   | A   | H   | K   | N   | R   | S   | V   | A   | E   |
| VIM-28 | T   | A   | N   | V   | V   | K   | A   | H   | K   | N   | R   | S   | V   | A   | E   |
| VIM-29 | T   | A   | N   | V   | V   | K   | A   | H   | K   | N   | R   | S   | V   | A   | E   |
| VIM-30 | T   | T   | N   | V   | V   | K   | A   | H   | T   | N   | R   | S   | V   | V   | E   |
| VIM-31 | T   | T   | N   | V   | V   | K   | A   | H   | T   | N   | R   | S   | V   | V   | E   |
| VIM-32 | T   | A   | N   | V   | V   | K   | A   | H   | K   | N   | R   | S   | V   | A   | E   |
| VIM-33 | T   | A   | N   | V   | V   | K   | A   | H   | K   | N   | R   | S   | V   | A   | E   |
| VIM-34 | T   | A   | N   | V   | V   | K   | A   | H   | K   | N   | R   | S   | V   | A   | E   |
| VIM-35 | T   | A   | N   | V   | V   | K   | A   | H   | K   | N   | R   | S   | V   | A   | E   |
| VIM-36 | T   | T   | N   | V   | V   | K   | A   | H   | T   | N   | R   | S   | V   | V   | E   |
| VIM-37 | T   | A   | N   | V   | V   | K   | A   | H   | K   | N   | R   | S   | V   | A   | E   |
| VIM-38 | T   | A   | N   | V   | V   | T   | A   | H   | K   | N   | R   | S   | V   | V   | E   |

Gray: Signal peptide; Red: Zn(II) ligands; Green: positions related to substrate preferences
