# Supplementary material
Source: PubMed Central journal article supplement (PMC4790370)
Supplement: antibiotics-03-00285-s002.pdf [file antibiotics-03-00285-s002.pdf]

IMP variants protein sequence alignment- BBL numbering

|        |    |    |    |    |    |    |    |    |    |     |     |     |     |     |     |     |     |     |     |     |     |     |     |     |     |     |     |     |     |     |     |     |     |     |     |     |
|--------|----|----|----|----|----|----|----|----|----|-----|-----|-----|-----|-----|-----|-----|-----|-----|-----|-----|-----|-----|-----|-----|-----|-----|-----|-----|-----|-----|-----|-----|-----|-----|-----|-----|
|        | 91 | 92 | 93 | 94 | 95 | 96 | 97 | 98 | 99 | 100 | 101 | 102 | 103 | 104 | 108 | 109 | 110 | 111 | 112 | 113 | 114 | 115 | 116 | 117 | 118 | 119 | 120 | 121 | 122 | 123 | 124 | 125 | 126 | 127 | 128 | 129 |
| IMP-1  | D  | T  | E  | K  | L  | V  | T  | W  | F  | V   | E   | R   | G   | Y   | K   | I   | K   | G   | S   | I   | S   | S   | H   | F   | H   | S   | D   | S   | T   | G   | G   | I   | E   | W   | L   | N   |
| IMP-2  | D  | T  | E  | K  | L  | V  | N  | W  | F  | V   | E   | R   | G   | Y   | K   | I   | K   | G   | T   | I   | S   | S   | H   | F   | H   | S   | D   | S   | T   | G   | G   | I   | E   | W   | L   | N   |
| IMP-3  | D  | T  | E  | K  | L  | V  | T  | W  | F  | V   | E   | R   | G   | Y   | K   | I   | K   | G   | S   | I   | S   | S   | H   | F   | H   | S   | D   | S   | T   | G   | G   | I   | E   | W   | L   | N   |
| IMP-4  | D  | T  | E  | K  | L  | V  | T  | W  | F  | V   | E   | R   | G   | Y   | K   | I   | K   | G   | S   | I   | S   | S   | H   | F   | H   | S   | D   | S   | T   | G   | G   | I   | E   | W   | L   | N   |
| IMP-5  | D  | T  | E  | K  | L  | V  | T  | W  | F  | V   | E   | R   | G   | Y   | K   | I   | K   | G   | S   | I   | S   | S   | H   | F   | H   | S   | D   | S   | T   | G   | G   | I   | E   | W   | L   | N   |
| IMP-6  | D  | T  | E  | K  | L  | V  | T  | W  | F  | V   | E   | R   | G   | Y   | K   | I   | K   | G   | S   | I   | S   | S   | H   | F   | H   | S   | D   | S   | T   | G   | G   | I   | E   | W   | L   | N   |
| IMP-7  | D  | T  | E  | K  | L  | V  | T  | W  | F  | V   | E   | R   | G   | Y   | K   | I   | K   | G   | S   | I   | S   | S   | H   | F   | H   | S   | D   | S   | T   | G   | G   | I   | E   | W   | L   | N   |
| IMP-8  | D  | T  | E  | K  | L  | V  | N  | W  | F  | V   | E   | R   | G   | Y   | K   | I   | K   | G   | T   | I   | S   | S   | H   | F   | H   | S   | D   | S   | T   | G   | G   | I   | E   | W   | L   | N   |
| IMP-9  | D  | T  | E  | N  | L  | V  | N  | W  | F  | V   | E   | R   | G   | Y   | R   | I   | K   | G   | S   | I   | S   | S   | H   | F   | H   | S   | D   | S   | T   | G   | G   | I   | E   | W   | L   | N   |
| IMP-10 | D  | T  | E  | K  | L  | V  | T  | W  | F  | V   | E   | R   | G   | Y   | K   | I   | K   | G   | S   | I   | S   | S   | H   | F   | H   | S   | D   | S   | T   | G   | G   | I   | E   | W   | L   | N   |
| IMP-11 | D  | T  | E  | K  | L  | V  | N  | W  | F  | V   | E   | R   | G   | Y   | K   | I   | K   | G   | S   | I   | S   | S   | H   | F   | H   | S   | D   | S   | T   | G   | G   | I   | E   | W   | L   | N   |
| IMP-12 | D  | T  | E  | K  | L  | V  | A  | W  | F  | V   | G   | R   | G   | Y   | K   | I   | K   | G   | S   | V   | S   | S   | H   | F   | H   | S   | D   | S   | T   | G   | G   | I   | E   | W   | L   | N   |
| IMP-13 | D  | T  | E  | K  | L  | V  | N  | W  | F  | V   | E   | R   | G   | Y   | E   | I   | K   | G   | T   | I   | S   | S   | H   | F   | H   | S   | D   | S   | T   | G   | G   | I   | E   | W   | L   | N   |
| IMP-14 | D  | T  | E  | K  | L  | V  | N  | W  | F  | V   | E   | R   | G   | Y   | K   | I   | K   | G   | S   | I   | S   | T   | H   | F   | H   | S   | D   | S   | T   | A   | G   | I   | E   | W   | L   | N   |
| IMP-15 | D  | T  | E  | K  | L  | V  | T  | W  | F  | V   | E   | R   | G   | Y   | K   | I   | K   | G   | S   | I   | S   | S   | H   | F   | H   | S   | D   | S   | T   | G   | G   | I   | E   | W   | L   | N   |
| IMP-16 | D  | T  | E  | K  | L  | V  | N  | W  | F  | V   | E   | R   | G   | Y   | K   | I   | K   | G   | S   | I   | S   | S   | H   | F   | H   | S   | D   | S   | T   | G   | G   | I   | E   | W   | L   | N   |
| IMP-18 | D  | T  | E  | K  | L  | V  | N  | W  | F  | I   | E   | H   | G   | Y   | R   | I   | K   | G   | S   | I   | S   | T   | H   | F   | H   | S   | D   | S   | T   | A   | G   | I   | E   | W   | L   | N   |
| IMP-19 | D  | T  | E  | K  | L  | V  | N  | W  | F  | V   | E   | R   | G   | Y   | K   | I   | K   | G   | T   | I   | S   | S   | H   | F   | H   | S   | D   | S   | T   | G   | G   | I   | E   | W   | L   | N   |
| IMP-20 | D  | T  | E  | K  | L  | V  | N  | W  | F  | V   | E   | R   | G   | Y   | K   | I   | K   | G   | T   | I   | S   | S   | H   | F   | H   | S   | D   | S   | T   | G   | G   | I   | E   | W   | L   | N   |
| IMP-21 | D  | T  | E  | K  | L  | V  | N  | W  | F  | V   | E   | R   | G   | Y   | K   | I   | K   | G   | S   | I   | S   | S   | H   | F   | H   | S   | D   | S   | T   | G   | G   | I   | E   | W   | L   | N   |
| IMP-22 | D  | T  | E  | K  | L  | V  | T  | W  | F  | V   | E   | R   | G   | Y   | K   | I   | K   | G   | S   | I   | S   | S   | H   | F   | H   | S   | D   | S   | T   | G   | G   | I   | E   | W   | L   | N   |
| IMP-24 | D  | T  | E  | K  | L  | V  | N  | W  | F  | V   | E   | R   | G   | Y   | K   | I   | K   | G   | T   | I   | S   | S   | H   | F   | H   | S   | D   | S   | T   | G   | G   | I   | E   | W   | L   | N   |
| IMP-25 | D  | T  | E  | K  | L  | V  | T  | W  | F  | V   | E   | R   | G   | Y   | K   | I   | K   | G   | S   | I   | S   | S   | H   | F   | H   | S   | D   | S   | T   | G   | G   | I   | E   | W   | L   | N   |
| IMP-26 | D  | T  | E  | K  | L  | V  | T  | W  | F  | V   | E   | R   | G   | Y   | K   | I   | K   | G   | S   | I   | S   | S   | H   | F   | H   | S   | D   | S   | T   | G   | G   | I   | E   | W   | L   | N   |
| IMP-27 | D  | T  | E  | K  | L  | V  | N  | W  | F  | V   | E   | R   | G   | Y   | K   | I   | K   | G   | T   | V   | S   | S   | H   | F   | H   | S   | D   | S   | T   | G   | G   | I   | E   | W   | L   | N   |
| IMP-28 | D  | T  | E  | K  | L  | V  | T  | W  | F  | V   | G   | R   | G   | Y   | K   | I   | K   | G   | S   | I   | S   | S   | H   | F   | H   | S   | D   | S   | T   | G   | G   | I   | E   | W   | L   | N   |
| IMP-29 | D  | T  | E  | K  | L  | V  | T  | W  | F  | V   | E   | R   | G   | Y   | K   | I   | K   | G   | S   | I   | S   | S   | H   | F   | H   | S   | D   | S   | T   | G   | G   | I   | E   | W   | L   | N   |
| IMP-30 | D  | T  | E  | K  | L  | V  | T  | W  | F  | V   | E   | R   | G   | Y   | K   | I   | K   | G   | S   | I   | S   | S   | H   | F   | H   | S   | D   | S   | T   | G   | G   | I   | E   | W   | L   | N   |
| IMP-31 | D  | T  | E  | K  | L  | V  | R  | W  | F  | V   | G   | R   | G   | Y   | K   | I   | K   | G   | S   | I   | S   | S   | H   | F   | H   | S   | D   | S   | A   | G   | G   | I   | E   | W   | L   | N   |
| IMP-32 | D  | T  | E  | K  | L  | V  | N  | W  | F  | V   | E   | R   | G   | Y   | K   | I   | K   | G   | S   | I   | S   | T   | H   | F   | H   | S   | D   | S   | T   | A   | G   | I   | E   | W   | L   | N   |
| IMP-33 | D  | T  | E  | K  | L  | V  | N  | W  | F  | V   | E   | R   | G   | Y   | K   | I   | K   | G   | T   | I   | S   | S   | H   | F   | H   | S   | D   | S   | T   | G   | G   | I   | E   | W   | L   | N   |
| IMP-34 | D  | T  | E  | K  | L  | V  | T  | W  | F  | V   | E   | R   | G   | Y   | K   | I   | K   | G   | S   | I   | S   | S   | H   | F   | H   | S   | D   | S   | T   | G   | G   | I   | E   | W   | L   | N   |
| IMP-35 | D  | T  | E  | K  | L  | V  | R  | W  | F  | V   | G   | R   | G   | Y   | K   | I   | K   | G   | S   | I   | S   | S   | H   | F   | H   | S   | D   | S   | A   | G   | G   | I   | E   | W   | L   | N   |
| IMP-37 | D  | T  | E  | K  | L  | V  | N  | W  | F  | V   | E   | R   | G   | Y   | E   | I   | K   | G   | T   | I   | S   | S   | H   | F   | H   | S   | D   | S   | A   | G   | G   | I   | E   | W   | L   | N   |
| IMP-38 | D  | T  | E  | K  | L  | V  | T  | W  | F  | V   | E   | R   | G   | Y   | K   | I   | K   | G   | S   | I   | S   | S   | H   | F   | H   | S   | D   | S   | T   | G   | G   | I   | E   | W   | L   | N   |
| IMP-40 | D  | T  | E  | K  | L  | V  | T  | W  | F  | V   | E   | R   | G   | Y   | K   | I   | K   | G   | S   | I   | S   | S   | H   | F   | H   | S   | D   | S   | T   | G   | G   | I   | E   | W   | L   | N   |
| IMP-41 | D  | T  | E  | K  | L  | V  | N  | W  | F  | V   | E   | R   | G   | Y   | K   | I   | K   | G   | S   | I   | S   | S   | H   | F   | H   | S   | D   | S   | T   | G   | G   | I   | E   | W   | L   | N   |
| IMP-42 | D  | T  | E  | K  | L  | V  | T  | W  | F  | V   | E   | R   | G   | Y   | K   | I   | K   | G   | S   | I   | S   | S   | H   | F   | H   | S   | D   | S   | T   | G   | G   | I   | E   | W   | L   | N   |
| IMP-43 | D  | T  | E  | K  | L  | V  | T  | W  | F  | V   | E   | R   | G   | Y   | K   | I   | K   | G   | S   | I   | S   | S   | H   | F   | H   | S   | D   | S   | T   | G   | G   | I   | E   | W   | L   | N   |
| IMP-44 | D  | T  | E  | K  | L  | V  | N  | W  | F  | V   | E   | R   | G   | Y   | K   | I   | K   | G   | S   | I   | S   | S   | H   | F   | H   | S   | D   | S   | T   | G   | G   | I   | E   | W   | L   | N   |

Gray: Signal peptide; Red: Zn(II) ligands; Green: positions related to substrate preferences; Light Blue: positions that tolerate variations with minnor substrate dependence

IMP variants protein sequence alignment- BBL numbering

|        |     |     |     |     |     |     |     |     |     |     |     |     |     |     |     |     |     |     |     |     |      |     |     |     |     |     |     |     |     |     |     |     |     |     |     |     |
|--------|-----|-----|-----|-----|-----|-----|-----|-----|-----|-----|-----|-----|-----|-----|-----|-----|-----|-----|-----|-----|------|-----|-----|-----|-----|-----|-----|-----|-----|-----|-----|-----|-----|-----|-----|-----|
|        | 130 | 132 | 133 | 134 | 135 | 136 | 137 | 138 | 139 | 140 | 141 | 142 | 143 | 144 | 145 | 146 | 147 | 148 | 149 | 150 | 150a | 167 | 168 | 169 | 170 | 171 | 172 | 173 | 174 | 175 | 176 | 177 | 178 | 179 | 180 | 181 |
| IMP-1  | S   | R   | S   | I   | P   | T   | Y   | A   | S   | E   | L   | T   | N   | E   | L   | L   | K   | K   | D   | G   | K    | V   | Q   | A   | T   | N   | S   | F   | S   | G   | V   | N   | Y   | W   | L   | V   |
| IMP-2  | S   | Q   | S   | I   | P   | T   | Y   | A   | S   | E   | L   | T   | N   | E   | L   | L   | K   | K   | D   | G   | K    | V   | Q   | A   | K   | N   | S   | F   | S   | G   | V   | S   | Y   | W   | L   | V   |
| IMP-3  | S   | R   | S   | I   | P   | T   | Y   | A   | S   | E   | L   | T   | N   | E   | L   | L   | K   | K   | D   | G   | K    | V   | Q   | A   | T   | N   | S   | F   | S   | G   | V   | N   | Y   | W   | L   | V   |
| IMP-4  | S   | Q   | S   | I   | P   | T   | Y   | A   | S   | E   | L   | T   | N   | E   | L   | L   | K   | K   | D   | G   | K    | V   | Q   | A   | K   | N   | S   | F   | S   | G   | V   | N   | Y   | W   | L   | V   |
| IMP-5  | S   | Q   | S   | I   | P   | T   | Y   | A   | S   | E   | L   | T   | N   | E   | L   | L   | K   | K   | D   | G   | K    | V   | Q   | A   | K   | N   | S   | F   | S   | G   | V   | S   | Y   | W   | L   | V   |
| IMP-6  | S   | R   | S   | I   | P   | T   | Y   | A   | S   | E   | L   | T   | N   | E   | L   | L   | K   | K   | D   | G   | K    | V   | Q   | A   | T   | N   | S   | F   | S   | G   | V   | N   | Y   | W   | L   | V   |
| IMP-7  | S   | Q   | S   | I   | P   | T   | Y   | A   | S   | E   | L   | T   | N   | E   | L   | L   | K   | K   | D   | G   | K    | V   | Q   | A   | K   | N   | S   | F   | S   | G   | V   | S   | Y   | W   | L   | V   |
| IMP-8  | S   | Q   | S   | I   | P   | T   | Y   | A   | S   | E   | L   | T   | N   | E   | L   | L   | K   | K   | D   | G   | K    | V   | Q   | A   | K   | N   | S   | F   | S   | G   | V   | S   | Y   | W   | L   | V   |
| IMP-9  | S   | Q   | S   | I   | P   | T   | Y   | A   | S   | E   | L   | T   | N   | E   | L   | L   | K   | K   | D   | G   | K    | V   | Q   | A   | K   | Y   | S   | F   | S   | G   | V   | S   | Y   | W   | L   | V   |
| IMP-10 | S   | R   | S   | I   | P   | T   | Y   | A   | S   | E   | L   | T   | N   | E   | L   | L   | K   | K   | D   | G   | K    | V   | Q   | A   | T   | N   | S   | F   | S   | G   | V   | N   | Y   | W   | L   | V   |
| IMP-11 | S   | Q   | S   | I   | P   | T   | Y   | A   | S   | V   | L   | T   | N   | E   | L   | L   | K   | K   | D   | G   | K    | V   | Q   | A   | K   | N   | S   | F   | S   | G   | V   | S   | Y   | W   | L   | V   |
| IMP-12 | S   | Q   | S   | I   | P   | T   | Y   | A   | S   | E   | L   | T   | N   | E   | L   | L   | K   | K   | N   | G   | K    | V   | Q   | A   | T   | N   | S   | F   | S   | G   | V   | S   | Y   | W   | L   | V   |
| IMP-13 | S   | Q   | S   | I   | P   | T   | Y   | A   | S   | E   | L   | T   | N   | E   | L   | L   | K   | K   | S   | G   | K    | V   | Q   | A   | K   | Y   | S   | F   | S   | E   | V   | S   | Y   | W   | L   | V   |
| IMP-14 | S   | Q   | S   | I   | P   | T   | Y   | A   | S   | E   | L   | T   | N   | E   | L   | L   | K   | K   | D   | N   | K    | V   | Q   | A   | K   | H   | S   | F   | N   | G   | V   | S   | Y   | S   | L   | I   |
| IMP-15 | S   | Q   | S   | I   | P   | T   | Y   | A   | S   | E   | L   | T   | N   | E   | L   | L   | K   | K   | D   | G   | K    | V   | Q   | A   | K   | N   | S   | F   | S   | G   | G   | S   | Y   | W   | L   | V   |
| IMP-16 | S   | Q   | S   | I   | P   | T   | Y   | A   | S   | E   | L   | T   | N   | E   | L   | L   | K   | K   | N   | G   | K    | V   | Q   | A   | K   | N   | S   | F   | S   | G   | V   | S   | Y   | W   | L   | V   |
| IMP-18 | S   | Q   | S   | I   | S   | T   | Y   | A   | S   | E   | L   | T   | N   | E   | L   | L   | K   | K   | D   | N   | K    | V   | Q   | A   | T   | N   | S   | F   | S   | G   | V   | S   | Y   | S   | L   | I   |
| IMP-19 | S   | Q   | S   | I   | P   | T   | Y   | A   | S   | E   | L   | T   | N   | E   | L   | L   | K   | K   | D   | G   | K    | V   | Q   | A   | K   | N   | S   | F   | S   | G   | V   | S   | Y   | W   | L   | V   |
| IMP-20 | S   | Q   | S   | I   | P   | T   | Y   | A   | S   | E   | L   | T   | N   | E   | L   | L   | K   | K   | D   | G   | K    |     |     |     |     |     |     |     |     |     |     |     |     |     |     |     |

IMP variants protein sequence alignment- BBL numbering

|        |     |     |     |     |     |     |     |     |     |     |     |     |     |     |     |     |     |     |     |     |     |     |     |     |     |     |     |     |     |     |     |     |     |     |     |     |
|--------|-----|-----|-----|-----|-----|-----|-----|-----|-----|-----|-----|-----|-----|-----|-----|-----|-----|-----|-----|-----|-----|-----|-----|-----|-----|-----|-----|-----|-----|-----|-----|-----|-----|-----|-----|-----|
|        | 182 | 183 | 184 | 185 | 186 | 187 | 190 | 191 | 192 | 193 | 194 | 195 | 196 | 197 | 198 | 199 | 200 | 201 | 202 | 203 | 204 | 205 | 206 | 207 | 208 | 215 | 216 | 217 | 218 | 219 | 220 | 221 | 222 | 223 | 224 | 225 |
| IMP-1  | K   | N   | K   | I   | E   | V   | F   | Y   | P   | G   | P   | G   | H   | T   | P   | D   | N   | V   | V   | V   | W   | L   | P   | E   | R   | K   | I   | L   | F   | G   | G   | C   | F   | I   | K   | P   |
| IMP-2  | K   | N   | K   | I   | E   | V   | F   | Y   | P   | G   | P   | G   | H   | T   | P   | D   | N   | V   | V   | V   | W   | L   | P   | E   | R   | K   | I   | L   | F   | G   | G   | C   | F   | I   | K   | P   |
| IMP-3  | K   | N   | K   | I   | E   | V   | F   | Y   | P   | G   | P   | G   | H   | T   | P   | D   | N   | V   | V   | V   | W   | L   | P   | E   | R   | K   | I   | L   | F   | G   | G   | C   | F   | I   | K   | P   |
| IMP-4  | K   | N   | K   | I   | E   | V   | F   | Y   | P   | G   | P   | G   | H   | T   | P   | D   | N   | V   | V   | V   | W   | L   | P   | E   | R   | K   | I   | L   | F   | G   | G   | C   | F   | I   | K   | P   |
| IMP-5  | K   | N   | K   | I   | E   | V   | F   | Y   | P   | G   | P   | G   | H   | T   | P   | D   | N   | V   | V   | V   | W   | L   | P   | E   | R   | K   | I   | L   | F   | G   | G   | C   | F   | I   | K   | P   |
| IMP-6  | K   | N   | K   | I   | E   | V   | F   | Y   | P   | G   | P   | G   | H   | T   | P   | D   | N   | V   | V   | V   | W   | L   | P   | E   | R   | K   | I   | L   | F   | G   | G   | C   | F   | I   | K   | P   |
| IMP-7  | K   | N   | K   | I   | E   | V   | F   | Y   | P   | G   | P   | G   | H   | T   | P   | D   | N   | V   | V   | V   | W   | L   | P   | E   | R   | K   | I   | L   | F   | G   | G   | C   | F   | I   | K   | P   |
| IMP-8  | K   | N   | K   | I   | E   | V   | F   | Y   | P   | G   | P   | G   | H   | T   | P   | D   | N   | V   | V   | V   | W   | L   | P   | E   | R   | K   | I   | L   | F   | G   | G   | C   | F   | I   | K   | P   |
| IMP-9  | K   | N   | K   | I   | E   | V   | F   | Y   | P   | G   | P   | G   | H   | T   | P   | D   | N   | V   | V   | V   | W   | L   | P   | E   | R   | K   | I   | L   | F   | G   | G   | C   | F   | I   | K   | P   |
| IMP-10 | K   | N   | K   | I   | E   | V   | F   | Y   | P   | G   | P   | G   | H   | T   | P   | D   | N   | V   | V   | V   | W   | L   | P   | E   | R   | K   | I   | L   | F   | G   | G   | C   | F   | I   | K   | P   |
| IMP-11 | K   | N   | K   | I   | E   | V   | F   | Y   | P   | G   | P   | G   | H   | T   | P   | D   | N   | V   | V   | V   | W   | L   | P   | E   | R   | K   | I   | L   | F   | G   | G   | C   | F   | I   | K   | P   |
| IMP-12 | K   | N   | K   | I   | E   | V   | F   | Y   | P   | G   | P   | G   | H   | T   | P   | D   | N   | V   | V   | V   | W   | L   | P   | E   | R   | K   | I   | L   | F   | G   | G   | C   | F   | I   | K   | P   |
| IMP-13 | K   | N   | K   | I   | E   | V   | F   | Y   | P   | G   | P   | G   | H   | T   | P   | D   | N   | V   | V   | V   | W   | L   | P   | E   | R   | K   | I   | L   | F   | G   | G   | C   | F   | I   | K   | P   |
| IMP-14 | K   | N   | K   | I   | E   | V   | F   | Y   | P   | G   | P   | G   | H   | T   | P   | D   | N   | V   | V   | V   | W   | L   | P   | E   | R   | K   | I   | L   | F   | G   | G   | C   | F   | I   | K   | P   |
| IMP-15 | N   | N   | K   | I   | E   | V   | F   | Y   | P   | G   | P   | G   | H   | T   | P   | D   | N   | V   | V   | V   | W   | L   | P   | E   | R   | K   | I   | L   | F   | G   | G   | C   | F   | I   | K   | P   |
| IMP-16 | K   | N   | K   | I   | E   | V   | F   | Y   | P   | G   | P   | G   | H   | T   | P   | D   | N   | V   | V   | V   | W   | L   | P   | E   | R   | K   | I   | L   | F   | G   | G   | C   | F   | I   | K   | P   |
| IMP-18 | K   | N   | K   | I   | E   | V   | F   | Y   | P   | G   | P   | G   | H   | T   | P   | D   | N   | V   | V   | V   | W   | L   | P   | E   | R   | K   | I   | L   | F   | G   | G   | C   | F   | I   | K   | P   |
| IMP-19 | K   | N   | K   | I   | E   | V   | F   | Y   | P   | G   | P   | G   | H   | T   | P   | D   | N   | V   | V   | V   | W   | L   | P   | E   | R   | K   | I   | L   | F   | G   | G   | C   | F   | I   | K   | P   |
| IMP-20 | K   | N   | K   | I   | E   | V   | F   | Y   | P   | G   | P   | G   | H   | T   | P   | D   | N   | V   | V   | V   | W   | L   | P   | E   | R   | K   | I   | L   | F   | G   | G   | C   | F   | I   | K   | P   |
| IMP-21 | K   | N   | K   | I   | E   | V   | F   | Y   | P   | G   | P   | G   | H   | T   | P   | D   | N   | V   | V   | V   | W   | L   | P   | E   | R   | K   | I   | L   | F   | G   | G   | C   | F   | I   | K   | P   |
| IMP-22 | K   | N   | K   | I   | E   | V   | F   | Y   | P   | G   | P   | G   | H   | T   | P   | D   | N   | V   | V   | V   | W   | L   | P   | E   | R   | K   | I   | L   | F   | G   | G   | C   | F   | I   | K   | P   |
| IMP-24 | K   | N   | K   | I   | E   | V   | F   | Y   | P   | G   | P   | G   | H   | T   | P   | D   | N   | V   | V   | V   | W   | L   | P   | E   | R   | K   | I   | L   | F   | G   | G   | C   | F   | I   | K   | P   |
| IMP-25 | K   | N   | K   | I   | E   | V   | F   | Y   | P   | G   | P   | G   | H   | T   | P   | D   | N   | V   | V   | V   | W   | L   | P   | E   | R   | K   | I   | L   | F   | G   | G   | C   | F   | I   | K   | P   |
| IMP-26 | K   | N   | K   | I   | E   | V   | F   | Y   | P   | G   | P   | G   | H   | T   | P   | D   | N   | V   | V   | V   | W   | L   | P   | E   | R   | K   | I   | L   | F   | G   | G   | C   | F   | I   | K   | P   |
| IMP-27 | K   | D   | K   | I   | E   | V   | F   | Y   | P   | G   | P   | G   | H   | T   | P   | D   | N   | V   | V   | V   | W   | L   | P   | E   | R   | K   | I   | L   | F   | G   | G   | C   | F   | I   | K   | P   |
| IMP-28 | K   | N   | K   | I   | E   | V   | F   | Y   | P   | G   | P   | G   | H   | T   | P   | D   | N   | V   | V   | V   | W   | L   | P   | E   | R   | K   | I   | L   | F   | G   | G   | C   | F   | I   | K   | P   |
| IMP-29 | K   | K   | K   | I   | E   | V   | F   | Y   | P   | G   | P   | G   | H   | T   | P   | D   | N   | V   | V   | V   | W   | L   | P   | E   | R   | K   | I   | L   | F   | G   | G   | C   | F   | I   | K   | P   |
| IMP-30 | K   | N   | K   | I   | E   | V   | F   | Y   | P   | G   | P   | G   | H   | T   | P   | D   | N   | V   | V   | V   | W   | L   | P   | E   | R   | K   | I   | L   | F   | G   | G   | C   | F   | I   | K   | P   |
| IMP-31 | K   | H   | K   | I   | E   | V   | F   | Y   | P   | G   | P   | G   | H   | T   | P   | D   | N   | V   | V   | V   | W   | L   | P   | E   | R   | K   | I   | L   | F   | G   | G   | C   | F   | I   | K   | P   |
| IMP-32 | K   | N   | K   | I   | E   | V   | F   | Y   | P   | G   | P   | G   | H   | T   | P   | D   | N   | V   | V   | V   | W   | L   | P   | E   | R   | K   | I   | L   | F   | G   | G   | C   | F   | I   | K   | P   |
| IMP-33 | K   | N   | K   | I   | E   | V   | F   | Y   | P   | G   | P   | G   | H   | T   | P   | D   | N   | V   | V   | V   | W   | L   | P   | E   | R   | K   | I   | L   | F   | G   | G   | C   | F   | I   | K   | P   |
| IMP-34 | K   | N   | K   | I   | E   | V   | F   | Y   | P   | G   | P   | G   | H   | T   | P   | D   | N   | V   | V   | V   | W   | L   | P   | E   | R   | K   | I   | L   | F   | G   | G   | C   | F   | I   | K   | P   |
| IMP-35 | K   | H   | K   | I   | E   | V   | F   | Y   | P   | G   | P   | G   | H   | T   | P   | D   | N   | V   | V   | V   | W   | L   | P   | E   | R   | K   | I   | L   | F   | G   | G   | C   | F   | I   | K   | P   |
| IMP-37 | K   | N   | K   | I   | E   | V   | F   | Y   | P   | G   | P   | G   | H   | T   | P   | D   | N   | V   | V   | V   | W   | L   | P   | E   | R   | K   | I   | L   | F   | G   | G   | C   | F   | I   | K   | P   |
| IMP-38 | K   | N   | K   | I   | E   | V   | F   | Y   | P   | G   | P   | G   | H   | T   | P   | D   | N   | V   | V   | V   | W   | L   | P   | E   | R   | K   | I   | L   | F   | G   | G   | C   | F   | I   | K   | P   |
| IMP-40 | K   | N   | K   | I   | E   | V   | F   | Y   | P   | G   | P   | G   | H   | T   | P   | D   | N   | V   | V   | V   | W   | L   | P   | E   | R   | K   | I   | L   | F   | G   | G   | C   | F   | I   | K   | P   |
| IMP-41 | K   | N   | K   | I   | E   | V   | F   | Y   | P   | G   | P   | G   | H   | T   | P   | D   | N   | V   | V   | V   | W   | L   | P   | E   | R   | K   | I   | L   | F   | G   | G   | C   | F   | I   | K   | P   |
| IMP-42 | K   | N   | K   | I   | E   | V   | F   | Y   | P   | G   | P   | G   | H   | T   | P   | D   | N   | V   | V   | V   | W   | L   | P   | E   | R   | K   | I   | L   | F   | G   | G   | C   | F   | I   | K   | P   |
| IMP-43 | K   | K   | K   | I   | E   | V   | F   | Y   | P   | G   | P   | G   | H   | T   | P   | D   | N   | V   | V   | V   | W   | L   | P   | E   | R   | K   | I   | L   | F   | G   | G   | C   | F   | I   | K   | P   |
| IMP-44 | K   | N   | K   | I   | E   | V   | F   | Y   | P   | G   | P   | G   | H   | T   | P   | D   | N   | V   | V   | V   | W   | L   | P   | E   | R   | K   | I   | L   | F   | G   | G   | C   | F   | I   | K   | P   |

Gray: Signal peptide; Red: Zn(II) ligands; Green: positions related to substrate preferences; Light Blue: positions that tolerate variations with minor substrate dependence

IMP variants protein sequence alignment- BBL numbering

|        |     |     |     |     |     |     |     |     |     |     |     |     |     |     |     |     |     |     |     |     |     |     |     |     |   |   |     |     |     |     |     |     |     |     |     |     |
|--------|-----|-----|-----|-----|-----|-----|-----|-----|-----|-----|-----|-----|-----|-----|-----|-----|-----|-----|-----|-----|-----|-----|-----|-----|---|---|-----|-----|-----|-----|-----|-----|-----|-----|-----|-----|
|        | 227 | 228 | 231 | 232 | 233 | 234 | 235 | 236 | 237 | 238 | 241 | 242 | 243 | 244 | 245 | 246 | 247 | 248 | 249 | 250 | 251 | 252 | 253 | 254 | a | b | 255 | 256 | 257 | 258 | 259 | 260 | 261 | 262 | 263 | 264 |
| IMP-1  | Y   | G   | L   | G   | N   | L   | G   | D   | A   | N   | I   | E   | A   | W   | P   | K   | S   | A   | K   | L   | L   | K   | S   | K   | Y | G | K   | A   | K   | L   | V   | V   | P   | S   | H   | S   |
| IMP-2  | D   | G   | L   | G   | N   | L   | G   | D   | A   | N   | L   | E   | A   | W   | P   | K   | S   | A   | K   | I   | L   | M   | S   | K   | Y | V | K   | A   | K   | L   | V   | V   | S   | S   | H   | S   |
| IMP-3  | Y   | G   | L   | G   | N   | L   | G   | D   | A   | N   | I   | E   | A   | W   | P   | K   | S   | A   | K   | L   | L   | K   | S   | K   | Y | G | K   | A   | K   | L   | V   | V   | P   | S   | H   | S   |
| IMP-4  | Y   | G   | L   | G   | N   | L   | G   | D   | A   | N   | L   | E   | A   | W   | P   | K   | S   | A   | K   | L   | L   | I   | S   | K   | Y | G | K   | A   | K   | L   | V   | V   | P   | S   | H   | S   |
| IMP-5  | Y   | G   | L   | G   | N   | L   | G   | D   | A   | N   | V   | E   | A   | W   | P   | K   | S   | A   | K   | L   | L   | M   | S   | K   | Y | G | K   | A   | K   | L   | V   | V   | P   | S   | H   | S   |
| IMP-6  | Y   | G   | L   | G   | N   | L   | G   | D   | A   | N   | I   | E   | A   | W   | P   | K   | S   | A   | K   | L   | L   | K   | S   | K   | Y | G | K   | A   | K   | L   | V   | V   | P   | S   | H   | S   |
| IMP-7  | Y   | G   | L   | G   | N   | L   | G   | D   | A   | N   | L   | E   | A   | W   | P   | K   | S   | A   | K   | L   | L   | V   | S   | K   | Y | G | K   | A   | K   | L   | V   | V   | P   | S   | H   | S   |
| IMP-8  | D   | G   | L   | G   | N   | L   | G   | D   | A   | N   | L   | E   | A   | W   | P   | K   | S   | A   | K   | I   | L   | M   | S   | K   | Y | G | K   | A   | K   | L   | V   | V   | S   | S   | H   | S   |
| IMP-9  | Y   | G   | L   | G   | N   | L   | G   | D   | A   | N   | L   | E   | A   | W   | P   | K   | S   | A   | K   | L   | L   | M   | S   | K   | Y | S | K   | A   | K   | L   | V   | V   | P   | S   | H   | S   |
| IMP-10 | Y   | G   | L   | G   | N   | L   | G   | D   | A   | N   | I   | E   | A   | W   | P   | K   | S   | A   | K   | L   | L   | K   | S   | K   | Y | G | K   | A   | K   | L   | V   | V   | P   | S   | H   | S   |
| IMP-11 | Y   | G   | L   | G   | N   | L   | D   | D   | A   | N   | V   | E   | A   | W   | P   | H   | S   | A   | E   | K   | L   | I   | S   | K   | Y | G | N   | A   | K   | L   | V   | V   | P   | S   | H   | S   |
| IMP-12 | D   | G   | L   | G   | N   | L   | D   | D   | A   | N   | L   | K   | A   | W   | P   | K   | S   | A   | K   | I   | L   | M   | S   | K   | Y | G | K   | A   | K   | L   | V   | V   | S   | S   | H   | S   |
| IMP-13 | H   | G   | L   | G   | N   | L   | G   | D   | A   | N   | L   | E   | A   | W   | P   | K   | S   | A   | K   | I   | L   | M   | S   | K   | Y | G | K   | A   | K   | L   | V   | V   | S   | S   | H   | S   |
| IMP-14 | D   | G   | L   | G   | Y   | L   | G   | D   | A   | N   | L   | E   | A   | W   | P   | K   | S   | A   | K   | I   | L   | M   | S   | K   | Y | G | K   | A   | K   | L   | V   | V   | S   | S   | H   | S   |
| IMP-15 | Y   | G   | L   | G   | N   | L   | G   | D   | A   | N   | L   | E   | A   | W   | P   | K   | S   | A   | K   | I   | L   | M   | S   | K   | Y | G | K   | A   | K   | L   | V   | V   | S   | S   | H   | S   |
| IMP-16 | Y   | G   | L   | G   | N   | L   | D   | D   | A   | N   | V   | E   | A   | W   | P   | H   | S   | A   | E   | I   | L   | M   | S   | R   | Y | G | N   | A   | K   | L   | V   | V   | P   | S   | H   | S   |
| IMP-18 | D   | G   | L   | G   | N   | L   | G   | D   | A   | N   | L   | E   | A   | W   | P   | K   | S   | A   | K   | I   | L   | M   | S   | K   | Y | G | K   | A   | K   | L   | V   | V   | S   | S   | H   | S   |
| IMP-19 | D   | G   | L   | G   | N   | L   | G   | D   | A   | N   | L   | E   | A   | W   | P   | K   | S   | A   | K   | I   | L   | M   | S   | K   | Y | V | K   | A   | K   | L   | V   | V   | S   | S   | H   | S   |
| IMP-20 | D</ |     |     |     |     |     |     |     |     |     |     |     |     |     |     |     |     |     |     |     |     |     |     |     |   |   |     |     |     |     |     |     |     |     |     |     |

IMP variants protein sequence alignment- BBL numbering

|        | 265 | 266 | 295 | 296 | 297 | 298 | 299 | 300 | 301 | 302 | 303 | 304 | 305 | 306 | 307 | 308 | 309 | 310 | 311 | 312 | 313 | 314 | 315 | 316 | 317 | 318 | 319 | 320 | 321 | 322 |   |   |   |
|--------|-----|-----|-----|-----|-----|-----|-----|-----|-----|-----|-----|-----|-----|-----|-----|-----|-----|-----|-----|-----|-----|-----|-----|-----|-----|-----|-----|-----|-----|-----|---|---|---|
| IMP-1  | E   | V   | G   | D   | A   | S   | L   | L   | K   | L   | T   | L   | E   | Q   | A   | V   | K   | G   | L   | N   | E   | S   | K   | K   | P   | S   | K   | P   | S   | N   | * |   |   |
| IMP-2  | E   | I   | G   | D   | A   | S   | L   | L   | K   | R   | T   | W   | E   | Q   | A   | V   | K   | G   | L   | N   | E   | S   | K   | K   | P   | S   | Q   | P   | S   | N   | * |   |   |
| IMP-3  | E   | V   | G   | D   | A   | S   | L   | L   | K   | L   | T   | L   | E   | Q   | A   | V   | K   | G   | L   | N   | E   | S   | K   | K   | P   | S   | K   | P   | S   | N   | * |   |   |
| IMP-4  | E   | A   | G   | D   | A   | S   | L   | L   | K   | L   | T   | L   | E   | Q   | A   | V   | K   | G   | L   | N   | E   | S   | K   | K   | P   | S   | K   | L   | S   | N   | * |   |   |
| IMP-5  | E   | V   | G   | D   | A   | S   | L   | L   | K   | R   | T   | L   | E   | Q   | A   | V   | K   | G   | L   | N   | E   | S   | K   | K   | P   | S   | K   | P   | S   | N   | * |   |   |
| IMP-6  | E   | V   | G   | D   | A   | S   | L   | L   | K   | L   | T   | L   | E   | Q   | A   | V   | K   | G   | L   | N   | E   | S   | K   | K   | P   | S   | K   | P   | S   | N   | * |   |   |
| IMP-7  | E   | V   | G   | D   | A   | S   | L   | L   | K   | R   | T   | L   | E   | Q   | A   | V   | K   | G   | L   | N   | E   | S   | K   | K   | L   | S   | K   | P   | S   | N   | * |   |   |
| IMP-8  | E   | I   | G   | D   | A   | S   | L   | L   | K   | R   | T   | W   | E   | Q   | A   | V   | K   | G   | L   | N   | E   | S   | K   | K   | P   | S   | Q   | P   | S   | N   | * |   |   |
| IMP-9  | D   | I   | G   | D   | S   | S   | L   | L   | K   | L   | T   | W   | E   | Q   | T   | V   | K   | G   | F   | N   | E   | S   | K   | K   | S   | T   | T   | A   | H   | *   | - |   |   |
| IMP-10 | E   | V   | G   | D   | A   | S   | L   | L   | K   | L   | T   | L   | E   | Q   | A   | V   | K   | G   | L   | N   | E   | S   | K   | K   | P   | S   | K   | P   | S   | N   | * |   |   |
| IMP-11 | D   | I   | G   | D   | A   | S   | L   | L   | K   | L   | T   | W   | E   | Q   | A   | V   | K   | G   | L   | N   | E   | S   | K   | K   | P   | S   | N   | T   | V   | H   | * | - |   |
| IMP-12 | E   | I   | G   | N   | A   | S   | L   | L   | K   | L   | T   | W   | E   | Q   | A   | V   | K   | G   | L   | K   | E   | S   | K   | K   | P   | L   | L   | P   | S   | N   | * | - |   |
| IMP-13 | E   | K   | G   | D   | A   | S   | L   | M   | K   | R   | T   | W   | E   | Q   | A   | L   | K   | G   | L   | K   | E   | S   | K   | K   | T   | S   | S   | P   | S   | N   | * | - |   |
| IMP-14 | D   | I   | G   | D   | V   | S   | L   | L   | K   | R   | T   | W   | E   | Q   | A   | V   | K   | G   | L   | N   | E   | S   | K   | K   | S   | S   | S   | Q   | P   | S   | N | * | - |
| IMP-15 | E   | T   | G   | N   | A   | S   | L   | L   | K   | L   | T   | W   | E   | Q   | A   | V   | K   | G   | L   | K   | E   | S   | K   | K   | P   | S   | L   | P   | S   | N   | * | - |   |
| IMP-16 | D   | V   | G   | D   | A   | S   | L   | L   | K   | L   | T   | W   | E   | Q   | A   | V   | K   | G   | L   | K   | E   | S   | K   | K   | P   | S   | Q   | P   | S   | N   | * | - |   |
| IMP-18 | E   | I   | G   | N   | A   | S   | L   | L   | Q   | R   | T   | W   | E   | Q   | A   | V   | K   | G   | L   | N   | E   | S   | K   | K   | P   | L   | Q   | P   | S   | N   | * | - |   |
| IMP-19 | E   | I   | G   | D   | A   | S   | L   | L   | K   | R   | T   | W   | E   | Q   | A   | V   | K   | G   | L   | N   | E   | S   | K   | K   | P   | S   | Q   | P   | S   | N   | * | - |   |
| IMP-20 | E   | I   | G   | D   | A   | S   | L   | L   | K   | R   | T   | W   | E   | Q   | A   | V   | K   | G   | L   | N   | E   | S   | K   | K   | P   | S   | Q   | P   | S   | N   | * | - |   |
| IMP-21 | D   | I   | G   | D   | A   | S   | L   | L   | K   | L   | T   | W   | E   | Q   | A   | V   | K   | G   | L   | N   | E   | S   | K   | K   | P   | S   | N   | T   | V   | H   | * | - |   |
| IMP-22 | D   | I   | G   | D   | A   | S   | L   | L   | K   | L   | T   | W   | E   | Q   | A   | V   | K   | G   | L   | K   | E   | S   | K   | K   | P   | S   | E   | P   | S   | N   | * | - |   |
| IMP-24 | E   | I   | G   | D   | A   | S   | L   | L   | K   | R   | T   | W   | E   | Q   | A   | V   | K   | G   | L   | N   | E   | S   | R   | K   | P   | S   | Q   | P   | S   | N   | * | - |   |
| IMP-25 | E   | V   | G   | D   | A   | S   | L   | L   | K   | L   | T   | L   | E   | Q   | A   | V   | K   | G   | L   | N   | E   | S   | K   | K   | P   | S   | K   | P   | S   | N   | * | - |   |
| IMP-26 | E   | A   | G   | D   | A   | S   | L   | L   | K   | R   | T   | L   | E   | Q   | A   | V   | K   | G   | L   | N   | E   | S   | K   | K   | P   | S   | K   | L   | S   | N   | * | - |   |
| IMP-27 | E   | T   | G   | D   | A   | T   | H   | L   | K   | R   | T   | W   | E   | Q   | A   | V   | K   | G   | L   | K   | E   | S   | K   | K   | T   | L   | Q   | P   | S   | N   | * | - |   |
| IMP-28 | E   | V   | G   | D   | A   | S   | L   | L   | K   | R   | T   | L   | E   | H   | A   | V   | K   | G   | L   | N   | E   | S   | K   | K   | P   | S   | K   | P   | S   | N   | * | - |   |
| IMP-29 | D   | I   | G   | N   | A   | S   | L   | L   | K   | L   | T   | W   | E   | Q   | A   | V   | K   | G   | L   | K   | E   | S   | K   | K   | P   | S   | Q   | P   | S   | N   | * | - |   |
| IMP-30 | E   | V   | G   | D   | A   | S   | L   | L   | K   | L   | T   | L   | E   | Q   | A   | V   | K   | G   | L   | N   | E   | S   | K   | K   | P   | S   | K   | P   | S   | N   | * | - |   |
| IMP-31 | E   | I   | G   | G   | A   | S   | L   | L   | K   | R   | T   | W   | E   | Q   | A   | V   | K   | G   | L   | K   | E   | S   | K   | N   | H   | S   | P   | K   | *   | -   | - |   |   |
| IMP-32 | D   | I   | G   | D   | V   | S   | L   | L   | K   | R   | T   | W   | E   | Q   | A   | V   | K   | G   | L   | N   | E   | S   | K   | K   | S   | S   | S   | Q   | P   | S   | N | * | - |
| IMP-33 | E   | K   | G   | D   | A   | S   | L   | L   | K   | R   | T   | W   | E   | Q   | A   | L   | K   | G   | L   | K   | E   | S   | K   | K   | T   | S   | S   | P   | S   | N   | * | - |   |
| IMP-34 | E   | V   | G   | D   | A   | S   | L   | L   | K   | L   | T   | L   | E   | Q   | A   | V   | K   | G   | L   | N   | E   | S   | K   | K   | P   | S   | K   | P   | S   | N   | * | - |   |
| IMP-35 | E   | I   | G   | G   | A   | S   | L   | L   | K   | R   | T   | W   | E   | Q   | A   | V   | K   | G   | L   | K   | E   | S   | K   | K   | P   | S   | Q   | P   | N   | T   | * | - |   |
| IMP-37 | E   | K   | G   | D   | A   | S   | L   | M   | K   | R   | T   | W   | E   | Q   | A   | L   | K   | G   | L   | K   | E   | S   | K   | K   | T   | S   | S   | Q   | S   | T   | A | S |   |
| IMP-38 | E   | A   | G   | D   | A   | S   | L   | L   | K   | L   | T   | L   | E   | Q   | A   | V   | K   | G   | L   | N   | E   | S   | K   | K   | P   | S   | K   | L   | S   | N   | * | - |   |
| IMP-40 | E   | V   | G   | D   | A   | S   | L   | L   | K   | L   | T   | L   | E   | Q   | A   | V   | K   | G   | L   | N   | E   | S   | K   | K   | P   | S   | K   | P   | S   | N   | * | - |   |
| IMP-41 | D   | I   | G   | D   | A   | S   | L   | L   | K   | L   | T   | W   | E   | Q   | A   | V   | K   | G   | L   | N   | E   | S   | K   | K   | S   | N   | T   | V   | H   | *   | - |   |   |
| IMP-42 | E   | V   | G   | D   | A   | S   | L   | L   | K   | L   | T   | L   | E   | Q   | A   | V   | K   | G   | L   | N   | E   | S   | K   | K   | P   | S   | K   | P   | S   | N   | * | - |   |
| IMP-43 | E   | V   | G   | D   | A   | S   | L   | L   | K   | R   | T   | L   | E   | Q   | A   | V   | K   | G   | L   | N   | E   | S   | K   | K   | L   | S   | K   | P   | S   | N   | * | - |   |
| IMP-44 | D   | I   | G   | D   | A   | S   | L   | L   | K   | L   | T   | W   | E   | Q   | A   | V   | K   | G   | L   | N   | E   | S   | K   | K   | S   | N   | T   | V   | H   | *   | - |   |   |

Gray: Signal peptide; Red: Zn(II) ligands; Green: positions related to substrate preferences; Light Blue: positions that tolerate variations with minor substrate dependence
